1 ***EARLY FLOWERING 3* controls temperature responsiveness**  
2 **of the circadian clock**

3

4 **Zihao Zhu, Marcel Quint, and Muhammad Usman Anwer\***

5

6 Institute of Agricultural and Nutritional Sciences, Martin Luther University

7 Halle-Wittenberg, Betty-Heimann-Str. 5, 06120 Halle (Saale), Germany

8

9 **Author Contributions**

10 M.U.A. and M.Q. conceived the project. Z. Z. performed the experiments. All  
11 authors contributed to write the article.

12

13 **Funding information**

14 The funding for this work was provided by grants from the European Social  
15 Fund and the Federal State of Saxony-Anhalt (International Graduate School  
16 AGRIPOLY - Determinants of Plant Performance, grant ZS/2016/08/80644)  
17 and by the Deutsche Forschungsgemeinschaft (Qu 141/6-1) to MQ.

18

19 \* **Correspondence:** [muhammad.anwer@landw.uni-halle.de](mailto:muhammad.anwer@landw.uni-halle.de)

## 20 **Summary**

21 Predictable changes in light and temperature during a diurnal cycle are major  
22 entrainment cues that enable the circadian clock to generate internal  
23 biological rhythms that are synchronized with the external environment. With  
24 the average global temperature predicted to keep increasing, the intricate  
25 light-temperature coordination that is necessary for clock functionality is  
26 expected to be seriously affected. Hence, understanding how temperature  
27 signals are perceived by the circadian clock has become an important issue,  
28 especially in light of climate change scenarios. In *Arabidopsis*, the clock  
29 component *EARLY FLOWERING 3 (ELF3)* not only serves as an essential  
30 light *Zeitnehmer*, but also functions as a thermosensor participating in  
31 thermomorphogenesis. However, the role of *ELF3* in temperature entrainment  
32 of the circadian clock is not fully understood. Here, we report that *ELF3* is  
33 essential for delivering temperature input to the clock. We demonstrate that in  
34 the absence of *ELF3*, the oscillator was unable to properly respond to  
35 temperature changes, resulting in an impaired gating of thermoresponses.  
36 Consequently, clock-controlled physiological processes such as rhythmic  
37 growth and cotyledon movement were disturbed. Together, our results reveal  
38 that *ELF3* is an essential *Zeitnehmer* for temperature sensing of the oscillator,  
39 and thereby for coordinating the rhythmic control of thermoresponsive  
40 physiological outputs.

41

42 **Key words:** *Arabidopsis thaliana*, circadian clock, temperature sensing,  
43 temperature entrainment, *EARLY FLOWERING 3 (ELF3)*,  
44 thermomorphogenesis, *Zeitnehmer*

## 45 **Introduction**

46 While latitudinal daylength remains stable, global warming results in  
47 increasing ambient temperatures. As a consequence, the intrinsic system that  
48 relies on the integrated daylength-temperature signals to control important  
49 physiological and developmental outputs could be seriously affected  
50 (Schaarschmidt *et al.*, 2020). This can lead to abnormal growth and  
51 developmental patterns that potentially result in serious yield losses in  
52 important crops (Quint *et al.*, 2016; Lippmann *et al.*, 2019). Since this trend of  
53 global temperature increase is predicted to continue, it is important to  
54 understand how key regulatory networks perceive light and temperature  
55 signals to control fundamental developmental and physiological processes.

56

57 The circadian clock is one such endogenous key network that utilizes external  
58 cues (also known as *Zeitgeber*), primarily light and temperature, as timing  
59 input to precisely synchronize internal cellular mechanisms with the external  
60 environment. The timing information from the *Zeitgeber* is received by  
61 oscillator components known as *Zeitnehmer* that help to reset and  
62 synchronize the clock with the external environment. This *Zeitgeber-*  
63 *Zeitnehmer* communication is called entrainment that subsequently sets the  
64 pace of the oscillator (Oakenfull & Davis, 2017). Once entrained, the  
65 oscillators generate a ~24h rhythmicity that can be sustained for long periods;  
66 even in the absence of environmental cues (i.e., free-running conditions, such  
67 as constant light and temperature). After synchronizing with the external  
68 environment, oscillators regulate the rhythmic accumulation of several  
69 transcripts, proteins, and metabolites. The circadian clock thereby confers  
70 fitness advantages by allowing organisms to anticipate and adapt to the  
71 changing environment (Covington *et al.*, 2008; Yamashino *et al.*, 2008; Anwer  
72 *et al.*, 2014; Ronald & Davis, 2017).

73

74 The central part of the clock, the oscillator, is composed of transcriptional-  
75 translational feedback loops (TTFLs) (Nohales & Kay, 2016). In *Arabidopsis*  
76 *thaliana* (*Arabidopsis*) three such loops, a morning loop, an evening loop and  
77 a central loop, constitute the oscillator. The central loop is a dual negative  
78 feedback loop comprised of two partially redundant MYB-like transcription

79 factors CIRCADIAN CLOCK ASSOCIATED 1 (CCA1) and LATE ELONGATED  
80 HYPOCOTYL (LHY), and a member of the PSEUDO-RESPONSE  
81 REGULATOR (PRR) family TIMING OF CAB EXPRESSION 1 (TOC1/PRR1)  
82 (Alabadí *et al.*, 2001; Huang *et al.*, 2012), which negatively regulate each  
83 other's expression. In the morning loop, CCA1/LHY repress *PRR7* and *PRR9*,  
84 which later repress *CCA1/LHY* (Nakamichi *et al.*, 2010; Adams *et al.*, 2015).  
85 The evening expression of TOC1 represses *GIGANTEA (GI)*, which in turn  
86 activates *TOC1*, which together form the evening loop (Kim *et al.*, 2007;  
87 Huang *et al.*, 2012). Besides these three fundamental loops, a complex of  
88 three evening phased proteins (known as evening complex or EC), consisting  
89 of ELF4, ELF3 and LUX ARRHYTHMO (LUX), has been established as an  
90 integral part of the oscillator. The EC directly represses the transcription of the  
91 morning loop member *PRR9* and the evening loop component *GI* (Nusinow *et al.*  
92 *et al.*, 2011; Herrero *et al.*, 2012; Ezer *et al.*, 2017). Furthermore, CCA1 directly  
93 represses *ELF3* and thereby connects the EC with the central loop (Lu *et al.*,  
94 2012; Kamioka *et al.*, 2016).

95

96 A constant *Zeitgeber-Zeitnehmer* communication in the entrainment process  
97 is critical to keep the oscillator in-phase with the external environment (Anwer  
98 *et al.*, 2020). The phytochrome B (phyB) photoreceptor functions as both light  
99 and temperature sensor and thereby is an important component of the  
100 entrainment mechanism. However, phyB does not act as *Zeitnehmer*, since it  
101 is neither required for clock entrainment, nor for oscillator function (Sanchez  
102 *et al.*, 2020). The interactions of phyB with ELF3 and GI present one possible  
103 *Zeitgeber-Zeitnehmer* junction through which light and temperature  
104 information may be delivered to the oscillator (Anwer *et al.*, 2020).  
105 Consistently, severe light and temperature signaling anomalies have been  
106 observed in *elf3* and *gi* mutants (Kolmos *et al.*, 2011; Anwer *et al.*, 2014;  
107 Panigrahi & Mishra, 2015; Anwer *et al.*, 2020). For instance, under free-  
108 running conditions oscillator defects such as arrhythmia in *elf3* and altered  
109 circadian periodicity in *gi* have been reported (Anwer *et al.*, 2014; Anwer *et al.*,  
110 2020). Besides that, both mutants display several other pleiotropic  
111 phenotypes such as elongated hypocotyl and altered flowering time,  
112 suggesting that several important clock-regulated downstream pathways are

113 also disrupted (McWatters *et al.*, 2000; Yamashino *et al.*, 2008; Kim *et al.*,  
114 2012; Anwer *et al.*, 2014; Box *et al.*, 2015; Raschke *et al.*, 2015; Anwer *et al.*,  
115 2020). Not surprisingly, they share common targets such as  
116 *PHYTOCHROME-INTERACTING FACTOR 4 (PIF4)* and *FLOWERING*  
117 *LOCUS T (FT)* (Nusinow *et al.*, 2011; Anwer *et al.*, 2020) to regulate important  
118 physiological and developmental processes such as growth and flowering  
119 time, respectively.

120

121 We recently demonstrated that photoperiod-responsive growth and flowering  
122 time was lost in *elf3 gi* double mutants, and established that these two genes  
123 are essential for clock entrainment to light signals (Anwer *et al.*, 2020).  
124 However, the mechanism of clock entrainment in response to temperature  
125 cycles is still poorly understood (Avello *et al.*, 2019). Among the little that is  
126 known, *PRR7* and *PRR9* are two components with conceivable roles in the  
127 temperature input to the oscillator (Salomé & McClung, 2005). The *prr7 prr9*  
128 double mutant displayed conditional arrhythmia depending on the temperature  
129 regime used during the entrainment (Salomé & McClung, 2005; Salomé *et al.*,  
130 2010). This suggests that these components are required for temperature  
131 input to the oscillator in a temperature-dependent manner.

132

133 The role of the EC (ELF3-ELF4-LUX) in the temperature input is also  
134 intriguing. All components of the EC physically bind to the recently established  
135 thermosensor phyB. Furthermore, the binding of the EC to its target gene  
136 promoters is temperature-dependent (Kolmos *et al.*, 2011; Herrero *et al.*,  
137 2012; Kim *et al.*, 2013; Box *et al.*, 2015; Huang & Nusinow, 2016; Ezer *et al.*,  
138 2017). Consistently, the EC has been proposed to be a night-time repressor of  
139 the temperature input to the clock (Mizuno *et al.*, 2014). This contradicts a  
140 previous finding that demonstrated *ELF3* to be an integral part of the oscillator  
141 and advocated against its function as a *Zeitnehmer* in the temperature-input  
142 pathway (Thines & Harmon, 2010). However, a recent finding that highlighted  
143 *ELF3* as a temperature sensor (independently of the EC) re-emphasizes the  
144 need of a comprehensive study examining *ELF3* function in temperature  
145 entrainment (Jung *et al.*, 2020).

146

147 In this study, we systematically investigate the role of *ELF3* in temperature  
148 entrainment of the circadian clock. We demonstrate that *ELF3* is essential for  
149 temperature input to the oscillator. In the absence of *ELF3*, the circadian  
150 oscillator failed to respond and synchronize to external temperature cycles.  
151 Furthermore, our data demonstrate that *ELF3* is also fundamental for the  
152 clock gating ability, which is essential to generate rhythmic processes by  
153 precisely allowing temperature information to pass through only during an  
154 optimum time window within a diurnal cycle. Our data thus establish *ELF3* as  
155 an essential temperature *Zeitnehmer* in the circadian oscillator. In the  
156 scenario of global warming, this understanding may be helpful to improve crop  
157 performance under higher temperatures.

158

## 159 **Materials and methods**

### 160 **Plant Materials and growth conditions**

161 All *Arabidopsis thaliana* lines used were in the *Ws-2* background. The *elf3-4*,  
162 *gi-158* and *elf3-4 gi-158* null mutants have been described previously (Zagotta  
163 *et al.*, 1996; Hicks *et al.*, 2001; Anwer *et al.*, 2020). Sterilized *Arabidopsis*  
164 seeds were cold stratified for 3 d in darkness, and were allowed to germinate  
165 on solid *Arabidopsis thaliana* solution (ATS) nutrient medium with 1% (weight :  
166 volume) sucrose (Lincoln *et al.*, 1990). Unless stated otherwise, seedlings  
167 were grown on vertically oriented plates in long day (LD, 16 h light : 8 h dark)  
168 or short day (SD, 8 h light : 16 h dark) with 90  $\mu\text{mol m}^{-2}\text{s}^{-1}$  photosynthetically  
169 active radiation (PAR) using white fluorescent lamps (T5 4000K). Seedlings  
170 were grown at constant 16°C or 22°C for 8 d, or at constant 20°C or 28°C for  
171 8 d. For temperature shift assays, seedlings grown at 20°C for 4 d were  
172 shifted to 28°C or were kept at 20°C for additional 4 d. For assays in constant  
173 light (LL, 90  $\mu\text{mol m}^{-2}\text{s}^{-1}$ ), seedlings were grown at constant 16°C, 22°C or  
174 28°C for 8 d. Seedlings were imaged, and hypocotyl length was measured  
175 using ImageJ (<http://image.nih.gov/ij/>).

176

### 177 **Measurements of growth rate and elevation angle**

178 To allow unobstructed visualization of hypocotyl and cotyledons in air,  
179 seedlings were grown vertically on the agar ledge formed by removing part of  
180 the agar in the square plate as previously described (Anwer *et al.*, 2020).

181 Imaging was started at Zeitgeber Time (ZT) 00 on day 3. Photographs were  
182 taken every 60 min for 96 h in constant light (LL, white fluorescent lamps: 30  
183  $\mu\text{mol m}^{-2}\text{s}^{-1}$ ) under specified thermocycles (12 h 22°C : 12 h 16°C or 12 h  
184 28°C : 12 h 22°C). For free-running conditions, seedlings were entrained by  
185 thermocycles for 2 d and then on day 3 at ZT00 were released into constant  
186 conditions (30  $\mu\text{mol m}^{-2}\text{s}^{-1}$  light and 22°C temperature). The imaging platform  
187 with infrared illumination was previously described (Anwer *et al.*, 2020). Image  
188 stacks were analyzed using ImageJ (<http://image.nih.gov/ij/>). The circadian  
189 parameters of cotyledon movement were determined using the MFourFit  
190 method integrated in the BioDare2 analysis platform (Zielinski *et al.*, 2014).  
191 The relative amplitude error (RAE) analysis was used to estimate the  
192 robustness of the circadian rhythm: RAE values range from 0 to 1, where 0  
193 represents a robust rhythm, and 1 represents no rhythm.

194

### 195 **Analysis of transcript levels**

196 Seedlings were entrained in constant light (LL, 90  $\mu\text{mol m}^{-2}\text{s}^{-1}$ ) or darkness  
197 (DD), under 12 h 22°C : 12 h 16°C thermocycles for 8 d. On day 9, starting  
198 from ZT00, the samples were harvested every 4 h. For the temperature-gating  
199 assay, seedlings were entrained under thermocycles (with LL) as described  
200 above for 8 d. On day 9, starting from ZT00, seedlings were either treated  
201 with a 4 h temperature pulse (28°C) at various ZTs, or were kept under same  
202 conditions (no treatment) before samples were harvested at the specified  
203 time. All experiments were performed using three biological replicates.

204 Isolation of total RNA samples from whole seedlings, reverse transcription-  
205 mediated quantitative real-time polymerase chain reaction (RT-qPCR) and  
206 primer sequences have been described previously (Anwer *et al.*, 2020). The  
207 primers used for *PRR7* were forward: 5'-TGAAAGTTGGAAAAGGACCA-3'  
208 and reverse: 5'-GTTCCACGTGCATTAGCTCT-3'.

209

### 210 **Results**

#### 211 ***ELF3* and *GI* are involved in temperature-photoperiod crosstalk**

212 Temperature and light independently and collaboratively serve as two  
213 prominent entrainment cues of the circadian clock (Eckardt, 2005; Avello *et*  
214 *al.*, 2019; Gil & Park, 2019). The major red-light photoreceptor phyB that

215 functions also as a thermosensor (Jung *et al.*, 2016; Legris *et al.*, 2016;  
216 Delker *et al.*, 2017) stabilizes ELF3 protein, suggesting a possible light-  
217 temperature signal transduction pathway (Reed *et al.*, 2000; Liu *et al.*, 2001;  
218 Nieto *et al.*, 2015). A previous study showed that *elf3* mutants were arrhythmic  
219 in continuous darkness (DD) after temperature entrainment (Thines &  
220 Harmon, 2010). However, since the phyB thermosensor is essentially  
221 nonfunctional in darkness, it remains unclear whether the role of *ELF3* in  
222 thermocycle entrainment is still sustained in light, with phyB activated.  
223 To investigate thermocycle entrainment in the presence of light, we decided to  
224 first estimate the extent of a possible temperature-photoperiod  
225 interconnection, since both *ELF3* and *GI* control the photoperiod sensing of  
226 the circadian clock (Anwer *et al.*, 2020). We used cellular elongation of the  
227 hypocotyl as a classic phenotypic readout, which is known to be highly  
228 responsive to both temperature and photoperiod variations (Niwa *et al.*, 2009).  
229 We measured the hypocotyl length of *Ws-2*, null mutants *elf3-4* and *gi-158*,  
230 and *elf3-4 gi-158* seedlings grown in long day (LD, 16 h light : 8 h dark, Fig.  
231 1a) or short day (SD, 8 h light : 16 h dark, Fig. 1b) conditions. To estimate  
232 temperature response under these photoperiods, the seedlings were grown at  
233 constant 16°C or 22°C for 8 d before hypocotyl measurements were taken.  
234 We found that the higher temperature resulted in the acceleration of growth in  
235 all four genotypes in both photoperiods (Fig. 1a,b). However, the extent of the  
236 response to higher temperature in LD or SD was different in these four  
237 genotypes. We found that *Ws-2* and *gi-158* were more responsive in SD than  
238 in LD, whereas *elf3-4* and *elf3-4 gi-158* displayed the opposite result (Fig. 1c).  
239  
240 Similar results were also observed in seedlings grown under similar  
241 photoperiods, but at a higher temperature regime (constant 20°C or 28°C).  
242 Here, only *Ws-2* was more responsive to temperature in SD (6 h light : 18 h  
243 dark, Fig. S1b) than in LD (18 h light : 6 h dark, Fig. S1a), whereas all three  
244 mutants displayed the opposite result (Fig. S1a-c). We detected a similar  
245 response in a temperature shift assay, where the 4-d-old seedlings grown at  
246 20°C were shifted to 28°C or were kept at 20°C for additional 4 d before  
247 hypocotyl measurements were taken (Fig. S1d-f). In addition, *elf3-4 gi-158*  
248 double mutant displayed an additive effect on hypocotyl length in LD (Fig.



249 S1a,d), but not in SD (Fig. 1b, Fig. S1b,e) or under constant 16°C (Fig. 1a,b).  
250 These data demonstrate that (i) *elf3* and *gi* mutants respond to ambient  
251 temperatures differently than the wild type Ws-2, and that (ii)  
252 temperature responsiveness of especially *elf3* but also *gi* mutants is strongly  
253 influenced by the photoperiod. Together, this suggests that *ELF3* and *GI* are  
254 important participants of a likely rather complicated temperature-photoperiod  
255 crosstalk.

256

257 Next, we sought to determine whether the thermoresponsive growth remains  
258 intact in the absence of photocycles and whether *ELF3* and *GI* play any  
259 significant role in determining the responsiveness to temperature under these  
260 non-cycling conditions. We examined the thermoresponsiveness of hypocotyl  
261 elongation in continuous light (LL), by measuring hypocotyl length of Ws-2,  
262 *elf3-4*, *gi-158*, and *elf3-4 gi-158* seedlings grown in LL at constant  
263 temperature of 16°C, 22°C or 28°C (Fig. S2). In contrast to the previous  
264 experiment, we found that in the absence of photocycles the temperature  
265 response of Ws-2 and all three mutant lines was largely similar (Fig. S2). As  
266 such, temperature response defects in *elf3* and *gi* mutants depend on the  
267 presence of photocycles, while their temperature response seems intact in the  
268 absence of photoperiods (LL). Taken together, our data indicate that both  
269 *ELF3* and *GI* play important roles in temperature-photoperiod crosstalk,  
270 however, they are not essential for temperature responsiveness under non-  
271 cycling conditions.

272

### 273 **Clock-controlled physiological processes require *ELF3* under** 274 **thermocycles**

275 The circadian clock controls rhythmic oscillation patterns of several  
276 physiological processes such as hypocotyl growth and leaf movement. Under  
277 diurnal conditions, circadian oscillators coordinate hypocotyl elongation with  
278 daily environmental changes such as photoperiod, resulting in maximum  
279 growth rate at dawn or early morning in SD and LD, respectively (Nozue *et al.*,  
280 2007; Niwa *et al.*, 2009; Anwer *et al.*, 2020). This is largely processed by the  
281 growth-repressive function of *ELF3* and *GI* during the night and day times,  
282 respectively (Anwer *et al.*, 2020).

283 While the conclusions of the data shown so far (Fig. 1, Fig. S1, Fig. S2) apply  
284 to non-cycling temperature conditions, we now aimed to understand the role  
285 of *ELF3* and *GI* under cycling temperature conditions. To investigate whether  
286 and how *ELF3* and *GI* contribute to rhythmic hypocotyl elongation in seedlings  
287 under temperature cycles (hereafter thermocycles), we measured the growth  
288 rates of *Ws-2*, *elf3-4*, *gi-158* and *elf3-4 gi-158* every hour for 4 d under  
289 thermocycles (12 h 22°C : 12 h 16°C) in the absence of photocycles (LL)  
290 (Fig. 2a,b, Table S1). We used these conditions to circumvent potential  
291 temperature-photoperiod crosstalk as shown above (Fig. 1, Fig. S1).

292

293 In *Ws-2* and *gi-158*, we detected rhythmic growth patterns with maximum  
294 growth rates during mid to late stages (~ZT08) of the warm period (22°C) (Fig.  
295 2b, Table S1). In contrast, no clear growth peaks were detected in *elf3-4* and  
296 *elf3-4 gi-158* (Fig. 2b, Table S1). In *elf3-4*, we detected a constant growth rate,  
297 which was much lower than *Ws-2* during the warm period (22°C) and  
298 marginally higher during the cool period (16°C). In *elf3-4 gi-158*, the growth  
299 rates were similar to *Ws-2* during the warm period (22°C), but were much  
300 higher during the cool period (16°C). Importantly, just like *elf3-4*, no clear  
301 growth peaks were detected (Fig. 2b, Table S1). Thus, these data indicated  
302 that rhythmic growth under thermocycles requires *ELF3*, while *GI* most likely  
303 only plays a minor role.

304

305 Like hypocotyl growth, cotyledon movement is another classic physiological  
306 output that is regulated by the circadian clock (Millar *et al.*, 1995). To further  
307 scrutinize the role of *ELF3* and *GI* in determining the functional capability of  
308 the clock under thermocycles, we measured the cotyledon elevation angle  
309 every hour of seedlings grown under thermocycles in LL (Fig. 2a,c). As  
310 expected for a functional clock, we detected rhythmic cotyledon movement in  
311 *Ws-2* and *gi-158*, with open and closed cotyledons during the warm (22°C)  
312 and cool (16°C) periods, respectively (Fig. 2a,c). This is consistent with the  
313 previous report where similar patterns were observed in *Col-0* and *gi-2*  
314 seedlings entrained by 12 h 22°C : 12 h 12°C thermocycles (Tseng *et al.*,  
315 2004). However, in contrast to *Ws-2* and *gi-158*, the cotyledon movement was  
316 undetectable in *elf3-4* and *elf3-4 gi-158* seedlings under the same conditions

317 (Fig. 2a,c), mirroring the hypocotyl growth rate data (Fig. 2b, Table S1) and  
318 again suggesting a dysfunctional clock. The relative amplitude error (RAE)  
319 analysis confirmed robust rhythms of the cotyledon movement in *Ws-2* and *gi-*  
320 *158* (RAE~0.5), whereas both *elf3-4* and *elf3-4 gi-158* were arrhythmic  
321 (RAE~1.0) (Fig. 2d).

322

323 To exclude the possibility that the rhythmic cotyledon movement observed in  
324 *Ws-2* and *gi-158* was driven by the temperature variations rather than the  
325 circadian oscillator, the 2-d-thermocycle-entrained seedlings were transferred  
326 into free-running conditions (LL and constant 22°C) and cotyledon movement  
327 was measured (Fig. S3a). Consistent with the results under thermocycles, we  
328 detected robust rhythms in *Ws-2* and *gi-158*, whereas both *elf3-4* and *elf3-4*  
329 *gi-158* were arrhythmic in free-running conditions (Fig. S3a,b). Previous  
330 studies have reported a thermocycle-dependent arrhythmia in *prp7 prp9*  
331 double mutant, with *prp7 prp9* displaying robust rhythms under high-regime  
332 thermocycles (28°C : 22°C) and arrhythmia under low-regime thermocycles  
333 (22°C : 12°C) (Salomé & McClung, 2005; Salomé *et al.*, 2010). To investigate  
334 whether the observed arrhythmia in *elf3-4* and *elf3-4 gi-158* is also depending  
335 on the thermocycle temperature regime, we monitored the cotyledon  
336 movement of the *Ws-2*, *elf3-4*, *gi-158* and *elf3-4 gi-158* seedlings under high-  
337 regime thermocycles (12 h 28°C : 12 h 22°C, Fig. S3c,d) and also under free-  
338 running conditions (LL and constant 22°C, Fig. S3e,f) after high-regime  
339 thermocycle entrainment. Consistent with the low-regime thermocycle results  
340 (Fig. 2c,d), robust rhythms were not detected in *elf3-4* and *elf3-4 gi-158* (Fig.  
341 S3c-f), which were evident from high RAE values. Collectively, these data  
342 demonstrate that in contrast to clock-controlled rhythmic processes under  
343 photocycles (Anwer *et al.*, 2020), only *ELF3*, but not *GI*, is essential for clock-  
344 controlled rhythmic processes under thermocycles.

345

### 346 **The oscillator's responsiveness to temperature changes requires *ELF3***

347 As rhythmic hypocotyl elongation and cotyledon movement are regulated by  
348 the circadian oscillator, we hypothesized that in the absence of *ELF3*, the  
349 central oscillator itself is dysfunctional in responding to temperature changes.  
350 To test this, we monitored the expression of the key central oscillator genes

351 *CCA1*, *LHY*, *PRR9*, *PRR7* and *TOC1* under thermocycles in LL (Fig. 3a-e,  
352 Table S2). As expected for a functional oscillator, *Ws-2* and *gi-158* showed  
353 rhythmic expression of these genes albeit differences in the expression levels  
354 were occasionally detected (Fig. 3a-e, Table S2). In *Ws-2* and *gi-158*, *CCA1*  
355 and *LHY* displayed expression peaks at ZT00/24, *PRR9* at ZT04, *PRR7* at  
356 ZT08, and *TOC1* at ZT16 (*Ws-2*) or ZT12 (*gi-158*) (Fig. 3a-e, Table S2). In  
357 contrast, no rhythmic expression was detected in *elf3-4* and *elf3-4 gi-158* (Fig.  
358 3a-e, Table S2). In these two mutants, almost no expression of *CCA1* and  
359 *LHY* can be detected, whereas *PRR9*, *PRR7* and *TOC1* maintained high  
360 levels of expression without oscillations (Fig. 3a-e, Table S2). Similar patterns  
361 of rhythmic gene expression were also detected when plants were grown  
362 under the same thermocycles in darkness (Fig. S4a-e, Table S3). The  
363 exceptions were that, in DD, *gi-158* displayed an advanced expression peak  
364 of *PRR7* at ZT04 (Fig. S4d, Table S3), and slight peaks of *CCA1*, *LHY* and  
365 *PRR9* expression at ZT00/24 were also detected in *elf3-4* (Fig. S4a,b,c, Table  
366 S3). No clear expression pattern of *TOC1* was detected in all four genotypes  
367 under these conditions (Fig. S4e, Table S3). Together, these results indicate  
368 that *ELF3* is required to correctly set the phase of the key central oscillator  
369 genes in response to diurnal temperature changes.

370

371 As the circadian clock regulates thermoresponsive growth by regulating the  
372 major growth promoter *PIF4* (Nusinow *et al.*, 2011; Box *et al.*, 2015; Raschke  
373 *et al.*, 2015), we next monitored the expression of *PIF4* as a proxy to gauge  
374 the oscillator's ability to regulate its target genes under thermocycles in LL  
375 (Fig. 3f, Table S2) and DD (Fig. S4f, Table S3). We found that, in *Ws-2* and *gi-*  
376 *158*, the expression of *PIF4* specifically peaked during the warm period  
377 (22°C) at ZT08 in LL (Fig. 3f, Table S2), consistent with their rhythmic  
378 hypocotyl elongation (Fig. 2b, Table S1). In DD, *Ws-2* displayed the *PIF4*  
379 expression peak at the same time (ZT08) as in LL, whereas *PIF4* expression  
380 was advanced and peaked at ZT04 in *gi-158* (Fig. S4f, Table S2). Importantly,  
381 in contrast to *Ws-2* and *gi-158*, no clear peak of *PIF4* expression was  
382 detected in *elf3-4* and *elf3-4 gi-158*. Both displayed pronounced high *PIF4*  
383 expression, especially during the cool period (16°C) in both LL (Fig. 3f, Table  
384 S2) and DD (Fig. S4f, Table S3). In *elf3-4* and *elf3-4 gi-158*, the *PIF4*

385 expression remained the same at almost all time-points (Fig. 3f, Fig. S4f,  
386 Table S2, Table S3). Taken together, our data demonstrate that the oscillator's  
387 ability to properly respond to temperature input depends on functional *ELF3*.

388

### 389 ***ELF3* is essential for precise gating of temperature signals**

390 One hallmark property of the circadian clock is a mechanism called 'gating', in  
391 which the oscillator regulates its own sensitivity to environmental inputs such  
392 as light and temperature in a time-of-day dependent manner. This ensures  
393 that the downstream processes are not influenced by these environmental  
394 inputs in an untimely manner. For instance, a sudden change in light and  
395 temperature caused by a cloud covering the sun would have no substantial  
396 affect on the clock-controlled rhythmic processes. This gating process thereby  
397 plays fundamental role to maintain correct rhythms of the clock-controlled  
398 outputs. To test the clock's gating ability in response to temperature, we  
399 monitored the expression of the key clock-regulated temperature-responsive  
400 genes *PRR7*, *PRR9* and *PIF4* in *Ws-2*, *elf3-4*, *gi-158* and *elf3-4 gi-158* (Fig.  
401 4a,b, Fig. S5).

402

403 Thermocycle-entrained seedlings were either treated with a 4 h temperature  
404 pulse (28°C pulse) at various ZTs, or were kept under same conditions (no  
405 treatment) before samples were harvested at the specified time-points. We  
406 observed that in *Ws-2*, the temperature responsiveness of these genes was  
407 mainly restricted from late night to early morning (between ZT16-ZT04), as an  
408 induction of *PRR7*, *PRR9* and *PIF4* expression was detected primarily at  
409 these time-points (Fig. 4a,b, Fig. S5). In *gi-158*, the gates were opened  
410 slightly early, as an early induction of *PRR7* (ZT12-ZT24), and *PIF4* (ZT16-  
411 ZT24) was observed (Fig. 4a,b). Interestingly, the gating ability of the  
412 oscillator was abolished in *elf3-4* and *elf3-4 gi-158*. Except for some random  
413 time-points where the high-temperature response was opposite to the WT,  
414 mostly no response to temperature pulse was detected. Hence, the  
415 expression levels of *PRR7*, *PRR9* and *PIF4* remained unchanged at the vast  
416 majority of time-points (Fig. 4a,b, Fig. S5).

417

418 Taken together, these data demonstrate that *ELF3* is not only essential to

419 generate robust rhythms under thermocycles but is also pivotal to maintain  
420 proper phase by blocking non-resetting temperature cues.

421

## 422 **Discussion**

423 Increase in night-time ambient temperatures due to global warming could  
424 severely affect key regulatory mechanisms such as the circadian clock that  
425 relies on predictable changes in daily temperature cycles to coordinate  
426 essential biological events with the external environment (Schaarschmidt *et*  
427 *al.*, 2020). How the circadian clock utilizes diurnal temperature information to  
428 synchronize internal cellular mechanisms to the external environment remains  
429 largely unresolved. Here, we demonstrate that the circadian clock component  
430 *ELF3* is essential to establish communication between the circadian clock and  
431 ambient temperature. In the absence of *ELF3*, the circadian clock fails to  
432 respond to regular temperature cycles, which result in arrhythmia of key  
433 physiological processes (Fig. 2, Fig. 3, Fig. S3, Fig. S4, Table S1, Table S2).  
434 Thus, our data establish *ELF3* as a *Zeitnehmer* essential to relay temperature  
435 information to the circadian oscillator.

436

437 The involvement of *ELF3* and *GI* in light signaling has been reported since  
438 their identification (Zagotta *et al.*, 1996; Fowler *et al.*, 1999; Huq *et al.*, 2000;  
439 McWatters *et al.*, 2000; Kim *et al.*, 2007; Kolmos *et al.*, 2011). However, only  
440 recently we could conclusively show that both are necessary for clock  
441 entrainment to light cycles (Anwer *et al.*, 2020). It is important to note that the  
442 oscillator response to diurnal light signals remained intact in the absence of  
443 either *elf3-4* or *gi-158*. The oscillator only became non-responsive to  
444 photocycles when both components were absent (Anwer *et al.*, 2020). This is  
445 in contrast to the findings we report here for temperature entrainment,  
446 demonstrating that the oscillator's ability to perceive temperature input during  
447 thermocycles is dependent largely on *ELF3* with *GI* playing only a minor role,  
448 if at all. Interestingly, besides these differences, we also observed a similar  
449 additive/synergistic relationship between *ELF3* and *GI* for thermocycles as  
450 reported for photocycles (Anwer *et al.*, 2020). The hyperelongated hypocotyl  
451 under LD and LL (Fig. 1a, Fig. S1a,d, Fig. S2, Fig. S6), increased growth rate  
452 under thermocycles (Fig. 2b, Table S1), and overall higher expression of

453 several genes (Fig. 3, Fig. S4, Table S2, Table S3) in *elf3-4 gi-158*, all  
454 consolidate their additive/synergistic function. However, clock entrainment to  
455 thermocycles is mainly dependent on *ELF3*.

456

457 In the literature, the role of *ELF3* as a temperature *Zeitnehmer* remained  
458 controversial. Thines and Harmon (2010) initially proposed that *ELF3* is an  
459 essential component of the oscillator but that it does not function as a  
460 *Zeitnehmer*. Their conclusions were based on the experiments performed on  
461 etiolated seedlings entrained to thermocycles in the darkness. Since under  
462 these conditions, phyB - a recently discovered temperature sensor that  
463 physically interacts with *ELF3* - was absent (Jung *et al.*, 2016), the non-  
464 responsiveness of the oscillator to thermocycles could be partly attributed to  
465 the absence of phyB, leaving a major flaw in their study (which the authors  
466 could not have known back then). A later study then attempted to address  
467 these deficiencies by utilizing different photoperiod-temperature combinations  
468 for entrainment and highlighted the role of the EC in temperature input to the  
469 clock (Mizuno *et al.*, 2014). However, with a complicated cross-talk that exists  
470 between temperature and photoperiod (Fig. 1, Fig. S1) (Park *et al.*, 2020), it  
471 was hard to gauge the exact role of the *ELF3* in temperature entrainment.

472

473 Using thermocycles in constant light enabled us to eliminate these  
474 complications while maintaining the phyB-thermosensor activity. Under these  
475 conditions we here demonstrate that the circadian clock fails to entrain to  
476 thermocycles in the absence of *ELF3* (Fig. 2). Furthermore, proper  
477 responsiveness of the oscillator components to regular temperature changes  
478 (Fig. 3) as well as to sudden temperature pulses were also absent in the *elf3-*  
479 *4* mutant (Fig. 4, Fig. S5). Consequently, clock-controlled physiological  
480 processes such as cotyledon movement and diurnal hypocotyl growth were  
481 arrhythmic under thermocycles in *elf3-4* (Fig. 2, Fig. S3). Moreover, in  
482 confirmation of Thines and Harmon (2010), the *elf3-4* mutant failed to  
483 generate robust rhythms of key clock genes under thermocycles in darkness  
484 (Fig. S4). These data clearly indicate that *ELF3* is an essential *Zeitnehmer*  
485 that is pivotal for clock entrainment to temperature cycles. In conjunction with  
486 the recent finding that a prion-like domain in *ELF3* functions as thermosensor,

487 the necessity of phyB to mediate the temperature input to the oscillator can  
488 theoretically be excluded. However, the role of phyB in clock-independent  
489 thermomorphogenesis could not be eliminated since all four genotypes tested  
490 displayed robust temperature-responsive hypocotyl growth in constant light  
491 under non-cycling conditions (Fig. S2).

492

493 Contrary to the essential role of *ELF3* in temperature input to the clock, it is  
494 not fundamentally required to relay light signals to the oscillator. The *elf3-4*  
495 mutant, albeit with altered amplitude, was capable of generating robust  
496 rhythms under photocycles, indicating a partially functional oscillator (Anwer *et*  
497 *al.*, 2020). Such rhythms were entirely absent in the same mutant under  
498 thermocycles, highlighting the importance of *ELF3* in temperature  
499 responsiveness of the oscillator (Figs 2-4, Figs S3-S5). However, the loss of  
500 *GI* - another component of light signaling - along with *ELF3* absence resulted  
501 in similar clock dysfunction under photocycles (Anwer *et al.*, 2020) as we  
502 demonstrate here for *elf3-4* under thermocycles. It therefore seems that the  
503 regulation of photocycle entrainment is more complex than the regulation of  
504 thermocycle entrainment. The existence of at least one additional component  
505 in the oscillator to maintain functionality under photocycles could be explained  
506 in an evolutionary context. First, under natural conditions, diurnal changes in  
507 light are the primary cue from which plants derive timing information. In  
508 principle, diurnal changes in temperature are just a byproduct of the presence  
509 or absence of the light. Second, being predominant photoautotrophs, plants  
510 require light to synthesize their food. Thus, on the one hand the presence of a  
511 robust clock provides a fitness advantage, on the other hand, however, a  
512 dysfunctional oscillator could be an existential threat. Therefore, not  
513 surprisingly, evolution has favored to develop a redundant mechanism to  
514 ensure a functional oscillator under light cycles.

515

516 Due to global warming, the intricate light-temperature relationship that is key  
517 to circadian clock functionality is being threatened by both relatively sudden  
518 as well as gradual increases in temperature (Lippmann *et al.*, 2019).

519 Especially elevated temperature during the night (in the absence of light),  
520 which has already shown to affect crop yields, could seriously affect the



521 clock's ability to synchronize the internal biology with the external environment  
522 (Schaarschmidt *et al.*, 2020). Our data establish *ELF3* as an essential  
523 *Zeitnehmer* and provide mechanistic explanation of how temperature cues are  
524 perceived and processed by the circadian clock. Since *ELF3* is a known  
525 breeding target in key crops (Faure *et al.*, 2012; Bendix *et al.*, 2015), these  
526 findings provide insightful information to plant breeders to develop future  
527 crops which are more resilient to temperature changes.

## 528 **References**

- 529 **Adams S, Manfield I, Stockley P, Carré IA. 2015.** Revised Morning Loops of the  
530 Arabidopsis Circadian Clock Based on Analyses of Direct Regulatory  
531 Interactions. *PLOS ONE* **10**(12): e0143943.
- 532 **Alabadí D, Oyama T, Yanovsky MJ, Harmon FG, Más P, Kay SA. 2001.**  
533 Reciprocal Regulation Between TOC1 and LHY/CCA1 Within the  
534 Arabidopsis Circadian Clock. *Science* **293**(5531): 880-883.
- 535 **Anwer MU, Boikoglou E, Herrero E, Hallstein M, Davis AM, Velikkakam**  
536 **James G, Nagy F, Davis SJ, Mockler TC. 2014.** Natural variation reveals  
537 that intracellular distribution of ELF3 protein is associated with function  
538 in the circadian clock. *eLife*.
- 539 **Anwer MU, Davis A, Davis SJ, Quint M. 2020.** Photoperiod sensing of the  
540 circadian clock is controlled by EARLY FLOWERING 3 and GIGANTEA. *The*  
541 *Plant Journal* **101**(6): 1397-1410.
- 542 **Avello PA, Davis SJ, Ronald J, Pitchford JW. 2019.** Heat the Clock: Entrainment  
543 and Compensation in Arabidopsis Circadian Rhythms. *Journal of circadian*  
544 *rhythms* **17**: 5-5.
- 545 **Bendix C, Marshall Carine M, Harmon Frank G. 2015.** Circadian Clock Genes  
546 Universally Control Key Agricultural Traits. *Molecular Plant* **8**(8): 1135-  
547 1152.
- 548 **Box Mathew S, Huang BE, Domijan M, Jaeger Katja E, Khattak Asif K, Yoo**  
549 **Seong J, Sedivy Emma L, Jones DM, Hearn Timothy J, Webb Alex AR, et**  
550 **al. 2015.** ELF3 Controls Thermoresponsive Growth in Arabidopsis.  
551 *Current Biology*(0).
- 552 **Covington MF, Maloof JN, Straume M, Kay SA, Harmer SL. 2008.** Global  
553 transcriptome analysis reveals circadian regulation of key pathways in  
554 plant growth and development. *Genome Biology* **9**(8): R130.
- 555 **Delker C, van Zanten M, Quint M. 2017.** Thermosensing enlightened. *Trends in*  
556 *Plant Science* **22**(3): 185-187.
- 557 **Eckardt NA 2005.** Temperature entrainment of the Arabidopsis circadian clock:  
558 *Am Soc Plant Biol*.
- 559 **Ezer D, Jung J-H, Lan H, Biswas S, Gregoire L, Box MS, Charoensawan V,**  
560 **Cortijo S, Lai X, Stöckle D, et al. 2017.** The evening complex coordinates  
561 environmental and endogenous signals in Arabidopsis. **3**: 17087.
- 562 **Faure S, Turner AS, Gruszka D, Christodoulou V, Davis SJ, von Korff M, Laurie**  
563 **DA. 2012.** Mutation at the circadian clock gene EARLY MATURITY 8  
564 adapts domesticated barley (*Hordeum vulgare*) to short growing seasons.  
565 *Proceedings of the National Academy of Sciences*.
- 566 **Fowler S, Lee K, Onouchi H, Samach A, Richardson K, Morris B, Coupland G,**

- 567 **Putterill J. 1999.** GIGANTEA: a circadian clock-controlled gene that  
568 regulates photoperiodic flowering in Arabidopsis and encodes a protein  
569 with several possible membrane-spanning domains. *EMBO J* **18**(17):  
570 4679-4688.
- 571 **Gil KE, Park CM. 2019.** Thermal adaptation and plasticity of the plant circadian  
572 clock. *New Phytologist* **221**(3): 1215-1229.
- 573 **Herrero E, Kolmos E, Bujdoso N, Yuan Y, Wang M, Berns MC, Uhlworm H,**  
574 **Coupland G, Saini R, Jaskolski M, et al. 2012.** EARLY FLOWERING4  
575 Recruitment of EARLY FLOWERING3 in the Nucleus Sustains the  
576 Arabidopsis Circadian Clock. *The Plant Cell Online*.
- 577 **Hicks KA, Albertson TM, Wagner DR. 2001.** EARLY FLOWERING3 encodes a  
578 novel protein that regulates circadian clock function and flowering in  
579 Arabidopsis. *The Plant Cell* **13**(6): 1281-1292.
- 580 **Huang H, Nusinow DA. 2016.** Into the Evening: Complex Interactions in the  
581 Arabidopsis Circadian Clock. *Trends in Genetics* **32**(10): 674-686.
- 582 **Huang W, Perez-Garcia P, Pokhilko A, Millar AJ, Antoshechkin I, Riechmann**  
583 **JL, Mas P. 2012.** Mapping the Core of the Arabidopsis Circadian Clock  
584 Defines the Network Structure of the Oscillator. *Science* **336**(6077): 75-79.
- 585 **Huq E, Tepperman JM, Quail PH. 2000.** GIGANTEA is a nuclear protein involved  
586 in phytochrome signaling in Arabidopsis. *Proc Natl Acad Sci U S A* **97**(17):  
587 9789-9794.
- 588 **Jung J-H, Barbosa AD, Hutin S, Kumita JR, Gao M, Derwort D, Silva CS, Lai X,**  
589 **Pierre E, Geng F, et al. 2020.** A prion-like domain in ELF3 functions as a  
590 thermosensor in Arabidopsis. *Nature*.
- 591 **Jung J-H, Domijan M, Klose C, Biswas S, Ezer D, Gao M, Khattak AK, Box MS,**  
592 **Charoensawan V, Cortijo S, et al. 2016.** Phytochromes function as  
593 thermosensors in Arabidopsis. *Science*.
- 594 **Kamioka M, Takao S, Suzuki T, Taki K, Higashiyama T, Kinoshita T,**  
595 **Nakamichi N. 2016.** Direct Repression of Evening Genes by CIRCADIAN  
596 CLOCK-ASSOCIATED1 in the Arabidopsis Circadian Clock. *The Plant Cell*  
597 **28**(3): 696.
- 598 **Kim W-Y, Fujiwara S, Suh S-S, Kim J, Kim Y, Han L, David K, Putterill J, Nam**  
599 **HG, Somers DE. 2007.** ZEITLUPE is a circadian photoreceptor stabilized  
600 by GIGANTEA in blue light. *Nature* **449**(7160): 356-360.
- 601 **Kim Y, Lim J, Yeom M, Kim H, Kim J, Wang L, Kim Woe Y, Somers David E,**  
602 **Nam Hong G. 2013.** ELF4 Regulates GIGANTEA Chromatin Access  
603 through Subnuclear Sequestration. *Cell Reports* **3**(3): 671-677.
- 604 **Kim Y, Yeom M, Kim H, Lim J, Koo HJ, Hwang D, Somers D, Nam HG. 2012.**  
605 GIGANTEA and EARLY FLOWERING 4 in Arabidopsis Exhibit Differential  
606 Phase-Specific Genetic Influences over a Diurnal Cycle. *Molecular Plant*.
- 607 **Kolmos E, Herrero E, Bujdoso N, Millar AJ, Toth R, Gyula P, Nagy F, Davis SJ.**  
608 **2011.** A Reduced-Function Allele Reveals That EARLY FLOWERING3  
609 Repressive Action on the Circadian Clock Is Modulated by Phytochrome  
610 Signals in Arabidopsis. *Plant Cell*.
- 611 **Legris M, Klose C, Burgie ES, Rojas CCR, Neme M, Hiltbrunner A, Wigge PA,**  
612 **Schäfer E, Vierstra RD, Casal JJ. 2016.** Phytochrome B integrates light  
613 and temperature signals in Arabidopsis. *Science* **354**(6314): 897-900.
- 614 **Lincoln C, Britton JH, Estelle M. 1990.** Growth and development of the axr1  
615 mutants of Arabidopsis. *The Plant Cell* **2**(11): 1071-1080.

- 616 **Lippmann R, Babben S, Menger A, Delker C, Quint M. 2019.** Development of  
617 Wild and Cultivated Plants under Global Warming Conditions. *Current*  
618 *Biology* **29**(24): R1326-R1338.
- 619 **Liu XL, Covington MF, Fankhauser C, Chory J, Wagner DR. 2001.** ELF3  
620 encodes a circadian clock-regulated nuclear protein that functions in an  
621 Arabidopsis PHYB signal transduction pathway. *The Plant Cell* **13**(6):  
622 1293-1304.
- 623 **Lu SX, Webb CJ, Knowles SM, Kim SHJ, Wang Z, Tobin EM. 2012.** CCA1 and  
624 ELF3 Interact in the Control of Hypocotyl Length and Flowering Time in  
625 Arabidopsis. *Plant Physiol* **158**(2): 1079-1088.
- 626 **McWatters HG, Bastow RM, Hall A, Millar AJ. 2000.** The ELF3zeitnehmer  
627 regulates light signalling to the circadian clock. *Nature* **408**(6813): 716-  
628 720.
- 629 **Millar AJ, Carre IA, Strayer CA, Chua N-H, Kay SA. 1995.** Circadian clock  
630 mutants in Arabidopsis identified by luciferase imaging. *Science*  
631 **267**(5201): 1161-1163.
- 632 **Mizuno T, Nomoto Y, Oka H, Kitayama M, Takeuchi A, Tsubouchi M,**  
633 **Yamashino T. 2014.** Ambient Temperature Signal Feeds into the  
634 Circadian Clock Transcriptional Circuitry Through the EC Night-Time  
635 Repressor in Arabidopsis thaliana. *Plant and Cell Physiology* **55**(5): 958-  
636 976.
- 637 **Nakamichi N, Kiba T, Henriques R, Mizuno T, Chua N-H, Sakakibara H. 2010.**  
638 PSEUDO-RESPONSE REGULATORS 9, 7, and 5 Are Transcriptional  
639 Repressors in the Arabidopsis Circadian Clock. *The Plant Cell Online*  
640 **22**(3): 594-605.
- 641 **Nieto C, López-Salmerón V, Davière J-M, Prat S. 2015.** ELF3-PIF4 interaction  
642 regulates plant growth independently of the Evening Complex. *Current*  
643 *Biology* **25**(2): 187-193.
- 644 **Niwa Y, Yamashino T, Mizuno T. 2009.** The circadian clock regulates the  
645 photoperiodic response of hypocotyl elongation through a coincidence  
646 mechanism in Arabidopsis thaliana. *Plant and Cell Physiology* **50**(4): 838-  
647 854.
- 648 **Nohales MA, Kay SA. 2016.** Molecular mechanisms at the core of the plant  
649 circadian oscillator. *Nat Struct Mol Biol* **23**(12): 1061-1069.
- 650 **Nozue K, Covington MF, Duek PD, Lorrain S, Fankhauser C, Harmer SL,**  
651 **Maloof JN. 2007.** Rhythmic growth explained by coincidence between  
652 internal and external cues. *Nature* **448**(7151): 358-361.
- 653 **Nusinow DA, Helfer A, Hamilton EE, King JJ, Imaizumi T, Schultz TF, Farre**  
654 **EM, Kay SA. 2011.** The ELF4-ELF3-LUX complex links the circadian clock  
655 to diurnal control of hypocotyl growth. *Nature* **475**(7356): 398-402.
- 656 **Oakenfull RJ, Davis SJ. 2017.** Shining a light on the Arabidopsis circadian clock.  
657 *Plant, Cell & Environment* **40**(11): 2571-2585.
- 658 **Panigrahi KCS, Mishra P. 2015.** GIGANTEA - An Emerging Story. *Frontiers in*  
659 *Plant Science* **6**.
- 660 **Park Y-J, Kim JY, Lee J-H, Lee B-D, Paek N-C, Park C-M. 2020.** GIGANTEA  
661 Shapes the Photoperiodic Rhythms of Thermomorphogenic Growth in  
662 Arabidopsis. *Molecular Plant* **13**(3): 459-470.
- 663 **Quint M, Delker C, Franklin KA, Wigge PA, Halliday KJ, Zanten M. 2016.**  
664 Molecular and genetic control of plant thermomorphogenesis. *Nat Plants*

- 665                   2.  
666 **Raschke A, Ibanez C, Ullrich K, Anwer M, Becker S, Glockner A, Trenner J,**  
667 **Denk K, Saal B, Sun X, et al. 2015.** Natural variants of ELF3 affect  
668 thermomorphogenesis by transcriptionally modulating PIF4-dependent  
669 auxin response genes. *BMC Plant Biology* **15**(1): 197.  
670 **Reed JW, Nagpal P, Bastow RM, Solomon KS, Dowson-Day MJ, Elumalai RP,**  
671 **Millar AJ. 2000.** Independent action of ELF3 and phyB to control  
672 hypocotyl elongation and flowering time. *Plant Physiology* **122**(4): 1149-  
673 1160.  
674 **Ronald J, Davis S. 2017.** *Making the clock tick: the transcriptional landscape of*  
675 *the plant circadian clock.*  
676 **Salomé PA, McClung CR. 2005.** PSEUDO-RESPONSE REGULATOR 7 and 9 Are  
677 Partially Redundant Genes Essential for the Temperature Responsiveness  
678 of the Arabidopsis Circadian Clock. *The Plant Cell Online* **17**(3): 791-803.  
679 **Salomé PA, Weigel D, McClung CR. 2010.** The role of the Arabidopsis morning  
680 loop components CCA1, LHY, PRR7, and PRR9 in temperature  
681 compensation. *The Plant Cell* **22**(11): 3650-3661.  
682 **Sanchez SE, Rugnone ML, Kay SA. 2020.** Light Perception: A Matter of Time.  
683 *Molecular Plant* **13**(3): 363-385.  
684 **Schaarschmidt S, Lawas LMF, Glaubitz U, Li X, Erban A, Kopka J, Jagadish**  
685 **SVK, Hinch DK, Zuther E. 2020.** Season Affects Yield and Metabolic  
686 Profiles of Rice (*Oryza sativa*) under High Night Temperature Stress in the  
687 Field. *Int J Mol Sci* **21**(9).  
688 **Thines B, Harmon FG. 2010.** Ambient temperature response establishes ELF3  
689 as a required component of the core Arabidopsis circadian clock. *Proc*  
690 *Natl Acad Sci U S A* **107**(7): 3257-3262.  
691 **Tseng T-S, Salomé PA, McClung CR, Olszewski NE. 2004.** SPINDLY and  
692 GIGANTEA interact and act in Arabidopsis thaliana pathways involved in  
693 light responses, flowering, and rhythms in cotyledon movements. *The*  
694 *Plant Cell* **16**(6): 1550-1563.  
695 **Yamashino T, Ito S, Niwa Y, Kunihiro A, Nakamichi N, Mizuno T. 2008.**  
696 Involvement of Arabidopsis Clock-Associated Pseudo-Response  
697 Regulators in Diurnal Oscillations of Gene Expression in the Presence of  
698 Environmental Time Cues. *Plant and Cell Physiology* **49**(12): 1839-1850.  
699 **Zagotta MT, Hicks KA, Jacobs CI, Young JC, Hangarter RP, Meeks-Wagner DR.**  
700 **1996.** The Arabidopsis ELF3 gene regulates vegetative  
701 photomorphogenesis and the photoperiodic induction of flowering. *The*  
702 *Plant Journal* **10**(4): 691-702.  
703 **Zielinski T, Moore AM, Troup E, Halliday KJ, Millar AJ. 2014.** Strengths and  
704 limitations of period estimation methods for circadian data. *PLOS ONE*  
705 **9**(5): e96462.  
706

707 **Figure legends**

708 **Fig. 1** *ELF3* and *GI* are involved in temperature-photoperiod crosstalk. (a, b)  
709 Representative images and quantification of the hypocotyl length of 8-d-old  
710 *Ws-2*, *elf3-4*, *gi-158* and *elf3-4 gi-158* seedlings grown in LD (16 h light : 8 h  
711 dark, a) and SD (8 h light : 16 h dark, b). Seedlings were grown at constant  
712 16°C or 22°C for 8 d. Scale bars = 4mm. (c) Hypocotyl length at 22°C relative  
713 to the median at 16°C as shown in (a) and (b). Box plots show medians and  
714 interquartile ranges. Dots represent biological replicates, and those greater  
715 than 1.5x interquartile range are outliers. Different letters above the boxes  
716 indicate significant differences (two-way ANOVA with Tukey's HSD test,  $P <$   
717 0.05).

718 **Fig. 2** Rhythmic growth and cotyledon movement under thermocycles require  
719 *ELF3*. (a) Representative images of 5-d-old *Ws-2* and *elf3-4* seedlings grown  
720 in LL under thermocycles. Non-shaded areas represent warm period (22°C),  
721 whereas blue-shaded areas represent cold period (16°C). Representative  
722 photographs taken every 4 h starting from ZT00 on day 6 are shown. Relative  
723 coordinates (dashed red lines) were generated to ensure that both cotyledons  
724 had the same position, no matter whether the position of the whole seedling  
725 changed or not during growth. The measured angles (physical quantities in  
726 red) between cotyledon position (from tip to base, red lines) and relative  
727 horizontal (dashed red lines in horizontal) are defined as elevation angles.  
728 The yellow lines indicate the measured length of the hypocotyls. Scale bars =  
729 1 mm. Sketches above the images are shown for illustration purposes and  
730 represent the cotyledon movement of a hypothetical plant. The red arcs  
731 represent the hypothetical angles between two cotyledons. (b, c)  
732 Quantification of hypocotyl growth (b) and cotyledon elevation angle (c) of  
733 *Ws-2*, *elf3-4*, *gi-158* and *elf3-4 gi-158* seedlings, grown under thermocycles  
734 as in (a). Starting from ZT00 on day 3, photographs were taken every hour.  
735 Lines represent the mean and ribbons indicate standard error of mean (SEM)  
736 ( $n = 8$ ). (d) Relative amplitude error of cotyledon movement data shown in (c).  
737 Box plots show medians and interquartile ranges. Outliers (greater than 1.5x  
738 interquartile range) are marked with open circles. Different letters above the  
739 boxes indicate significant differences (one-way ANOVA with Tukey's HSD test,  
740  $P < 0.05$ ).

741 **Fig. 3** *ELF3* is required for oscillator's responsiveness to temperature  
742 changes. (a-f) Transcript dynamics of key clock oscillator genes *CCA1* (a),  
743 *LHY* (b), *PRR9* (c), *PRR7* (d), *TOC1* (e) and major growth promoter *PIF4* (f).  
744 *Ws-2*, *elf3-4*, *gi-158* and *elf3-4 gi-158* seedlings were grown in LL under  
745 thermocycles for 8 d. On day 9, starting from ZT00, samples were harvested  
746 every 4 h. Non-shaded areas represent warm period (22°C), whereas blue-  
747 shaded areas represent cold period (16°C). Expression levels were  
748 normalized to *PROTEIN 19 PHOSPHATASE 2a subunit A3 (PP2A)*. Error  
749 bars indicate SEM (n = 3) of three biological replicates. The experiment was  
750 repeated twice with similar results.

751 **Fig. 4** *ELF3* is essential for precise gating of the temperature signals under  
752 thermocycles. (a, b) Effect of the temperature pulse at the specified ZTs on  
753 the expression of *PRR7* (a) and *PIF4* (b). *Ws-2*, *elf3-4*, *gi-158* and *elf3-4 gi-*  
754 *158* seedlings were grown in LL under thermocycles for 8 d. On day 9, the  
755 seedlings were either treated with a 4 h temperature pulse (28°C pulse) at  
756 indicated ZTs, or were kept under same conditions (no treatment, 22°C/16°C)  
757 before samples were harvested. At indicated ZTs, red bars represent gene  
758 expression levels after treatment with a temperature pulse, whereas black  
759 lines represent gene expression levels at the same time without treatment.  
760 Non-shaded areas represent warm period (22°C), whereas blue-shaded  
761 areas represent cold period (16°C). Expression levels were normalized to  
762 *PP2A*. Error bars indicate SEM (n = 3) of three biological replicates. Asterisks  
763 above lines or bars indicate significant differences (\*,  $P < 0.05$ ; \*\*,  $P < 0.01$ ;  
764 \*\*\*,  $P < 0.001$ ; Student's *t*-test).

765  
766 **Fig. S1** *ELF3* and *GI* are involved in temperature-photoperiod crosstalk at a  
767 higher temperature regime. (a, b, d, e) Representative images and  
768 quantification of the hypocotyl length of 8-d-old *Ws-2*, *elf3-4*, *gi-158* and *elf3-4*  
769 *gi-158* seedlings grown in LD (18 h light : 6 h dark, a, d) and SD (6 h light : 18  
770 h dark, b, e). (a, b) Seedlings were grown at constant 20°C or 28°C for 8 d. (d,  
771 e) Seedlings grown at 20°C for 4 d were shifted to 28°C or were kept at 20°C  
772 for additional 4 d. Scale bars = 4mm. (c, f) Hypocotyl length at 28°C relative to  
773 the median at 20°C as shown in (a) and (b), or in (d) and (e). Box plots show  
774 medians and interquartile ranges. Dots represent biological replicates, and

775 those greater than 1.5x interquartile range are outliers. Different letters above  
776 the boxes indicate significant differences (two-way ANOVA with Tukey's HSD  
777 test,  $P < 0.05$ ).

778

779 **Fig. S2** Thermoresponsive growth is intact in constant light. Quantification of  
780 the hypocotyl length of 8-d-old *Ws-2*, *elf3-4*, *gi-158* and *elf3-4 gi-158*  
781 seedlings grown in LL. Seedlings were grown at constant 16°C, 22°C or 28°C  
782 for 8 d. Box plots show medians and interquartile ranges. Dots represent  
783 biological replicates, and those greater than 1.5x interquartile range are  
784 outliers. Different letters above the boxes indicate significant differences (two-  
785 way ANOVA with Tukey's HSD test,  $P < 0.05$ ).

786

787 **Fig. S3** Rhythmic cotyledon movement under thermocycles requires *ELF3*. (a,  
788 c, e) Quantification of cotyledon elevation angle of *Ws-2*, *elf3-4*, *gi-158* and  
789 *elf3-4 gi-158* seedlings. (a) Seedlings were grown in LL under thermocycles  
790 for 2 d. On day 3, starting from ZT00, seedlings were released into constant  
791 conditions (LL and 22°C) and photographs were taken every hour. Non-  
792 shaded areas represent warm period (22°C), whereas blue-shaded areas  
793 represent cold period (16°C). (c) Seedlings were grown in LL under high-  
794 regime thermocycles for 2 d. On day 3, starting from ZT00, photographs were  
795 taken every hour. Orange-shaded areas represent warm period (28°C),  
796 whereas non-shaded areas represent cold period (22°C). (e) Seedlings were  
797 grown in LL under thermocycles as in (c). On day 3, starting from ZT00,  
798 seedlings were released into constant conditions (LL and 22°C) and  
799 photographs were taken every hour. Lines represent the mean and ribbons  
800 indicate SEM ( $n = 8$ ). (b, d, f) Relative amplitude error of cotyledon movement  
801 data shown in (a), (c) and (e). Box plots show medians and interquartile  
802 ranges. Outliers (greater than 1.5x interquartile range) are marked with open  
803 circles. Different letters above the boxes indicate significant differences (one-  
804 way ANOVA with Tukey's HSD test,  $P < 0.05$ ).

805

806 **Fig. S4** *ELF3* is required for oscillator's responsiveness to temperature  
807 changes in darkness. (a-f) Transcript dynamics of key clock oscillator genes

808 *CCA1* (a), *LHY* (b), *PRR9* (c), *PRR7* (d), *TOC1* (e) and major growth promoter  
809 *PIF4* (f). *Ws-2*, *elf3-4*, *gi-158* and *elf3-4 gi-158* seedlings were grown in DD  
810 under thermocycles for 8 d. On day 9, starting from ZT00, samples were  
811 harvested every 4 h. Non-shaded areas represent warm period (22°C),  
812 whereas blue-shaded areas represent cold period (16°C). Expression levels  
813 were normalized to *PP2A*. Error bars indicate SEM (n = 3) of three biological  
814 replicates.

815

816 **Fig. S5** *ELF3* is essential for precise gating of the temperature signals under  
817 thermocycles. Effect of the temperature pulse at the specified ZTs on the  
818 expression of *PRR9*. *Ws-2*, *elf3-4*, *gi-158* and *elf3-4 gi-158* seedlings were  
819 grown in LL under thermocycles for 8 d. On day 9, the seedlings were either  
820 treated with a 4 h temperature pulse (28°C pulse) at indicated ZTs or were  
821 kept under the same conditions (no treatment, 22°C/16°C) before samples  
822 were harvested. At indicated ZTs, red bars represent gene expression levels  
823 after treatment with a temperature pulse, whereas black lines represent gene  
824 expression levels at the same time without treatment. Non-shaded areas  
825 represent warm period (22°C), whereas blue-shaded areas represent cold  
826 period (16°C). Expression levels were normalized to *PP2A*. Error bars indicate  
827 SEM (n = 3) of three biological replicates. Asterisks above lines or bars  
828 indicate significant differences (\*,  $P < 0.05$ ; \*\*,  $P < 0.01$ ; \*\*\*,  $P < 0.001$ ;  
829 Student's *t*-test).

830

831 **Fig. S6** *ELF3* and *GI* display additive effect under thermocycles in constant  
832 light. Quantification of hypocotyl length of 6-d-old *Ws-2*, *elf3-4*, *gi-158* and  
833 *elf3-4 gi-158* seedlings grown in LL (30  $\mu\text{mol m}^{-2}\text{s}^{-1}$ ), under 12 h 22°C : 12 h  
834 16°C thermocycles. Box plots show medians and interquartile ranges. Outliers  
835 (greater than 1.5x interquartile range) are marked with open circles. Different  
836 letters above the boxes indicate significant differences (one-way ANOVA with  
837 Tukey's HSD test,  $P < 0.05$ ).



# Fig. 1

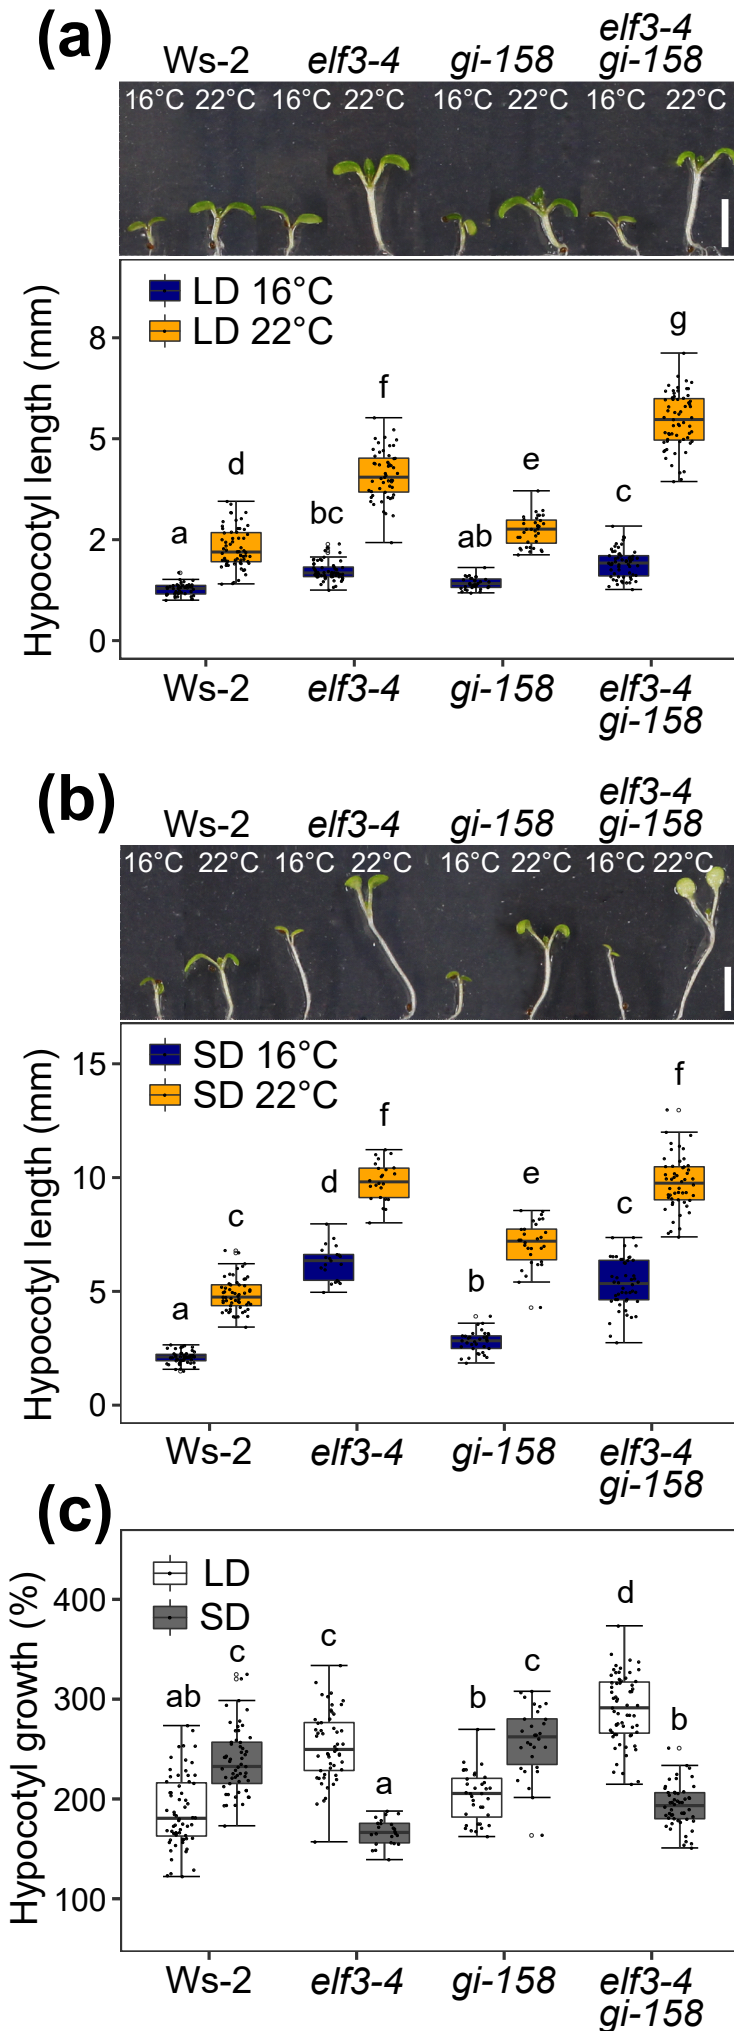

## Fig. 2

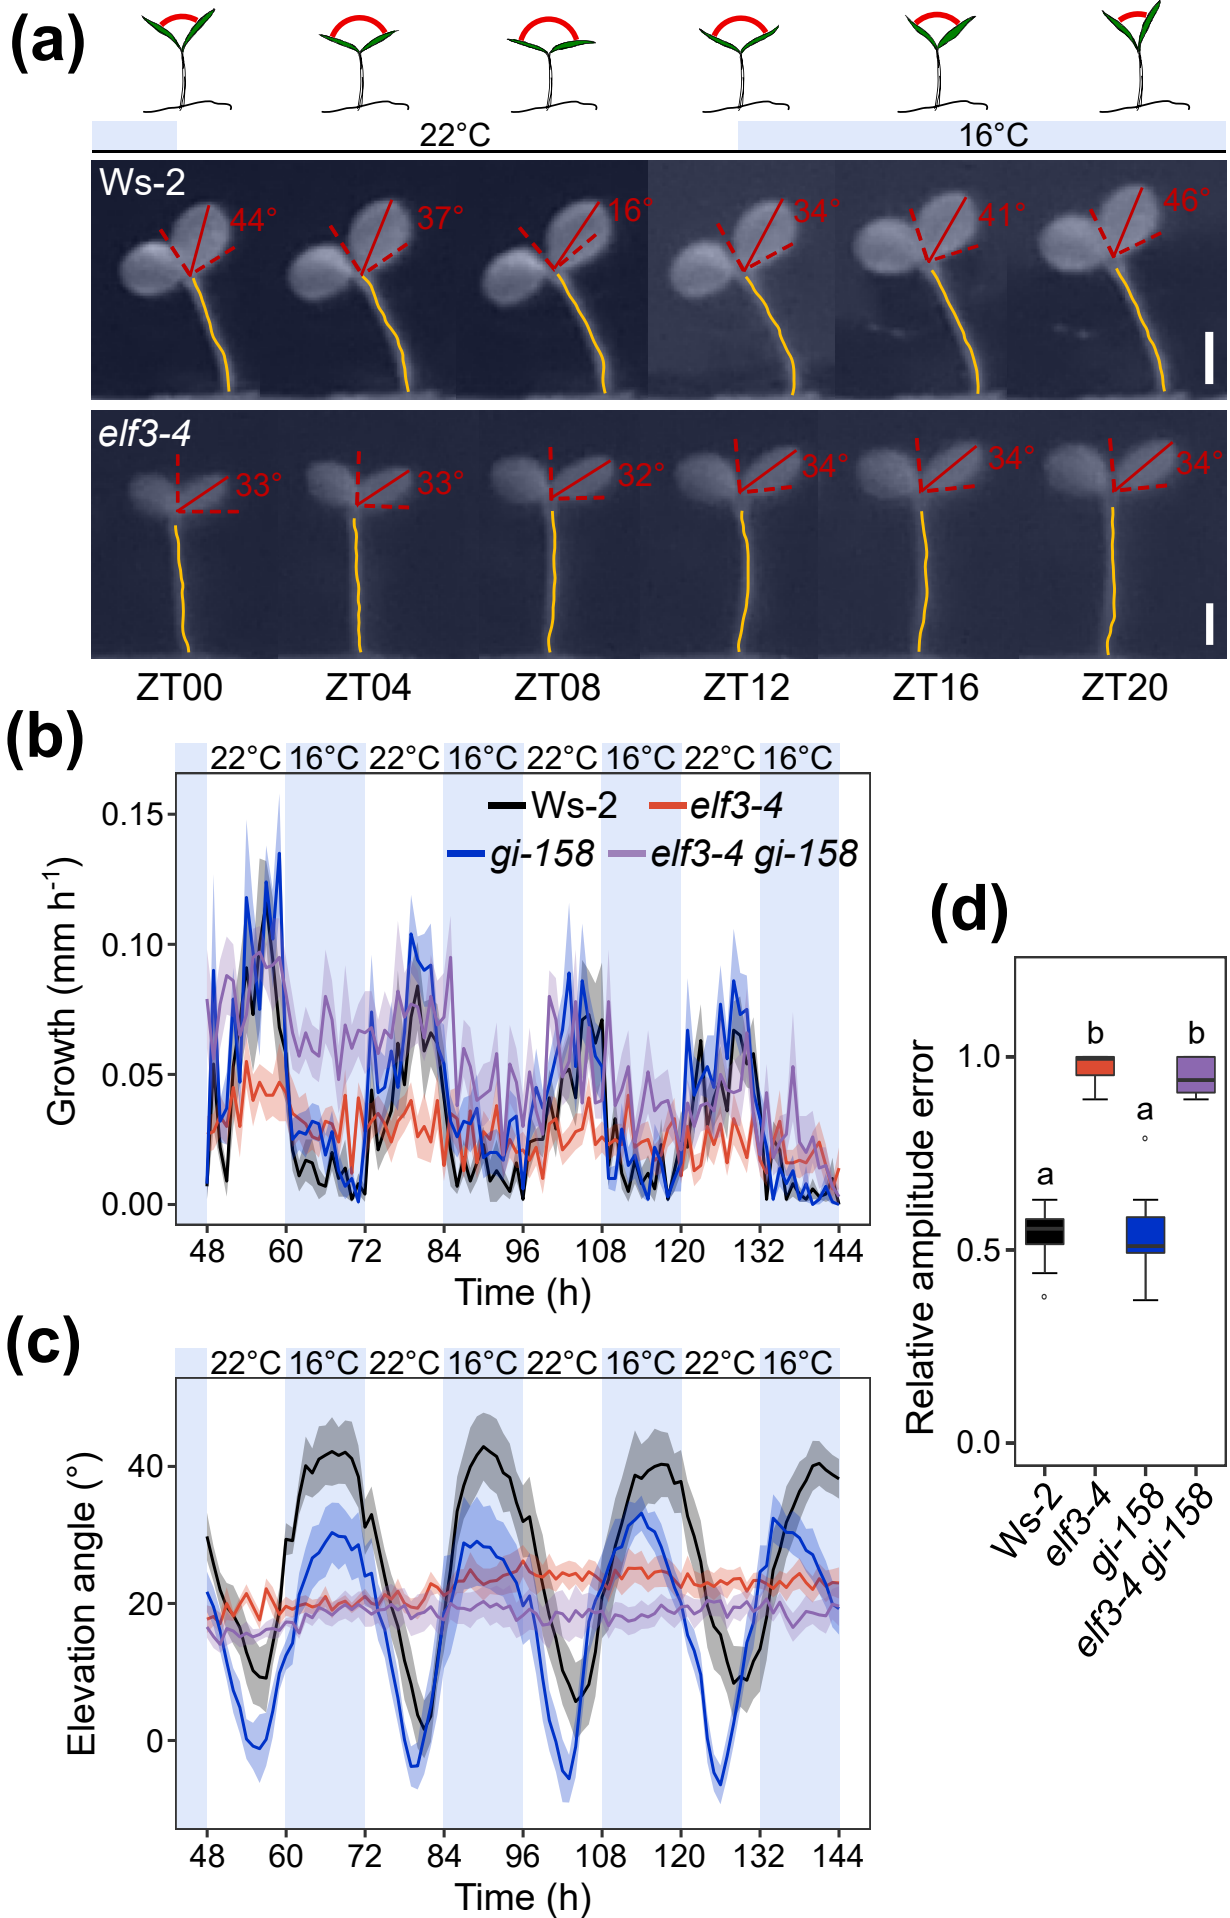

## Fig. 3

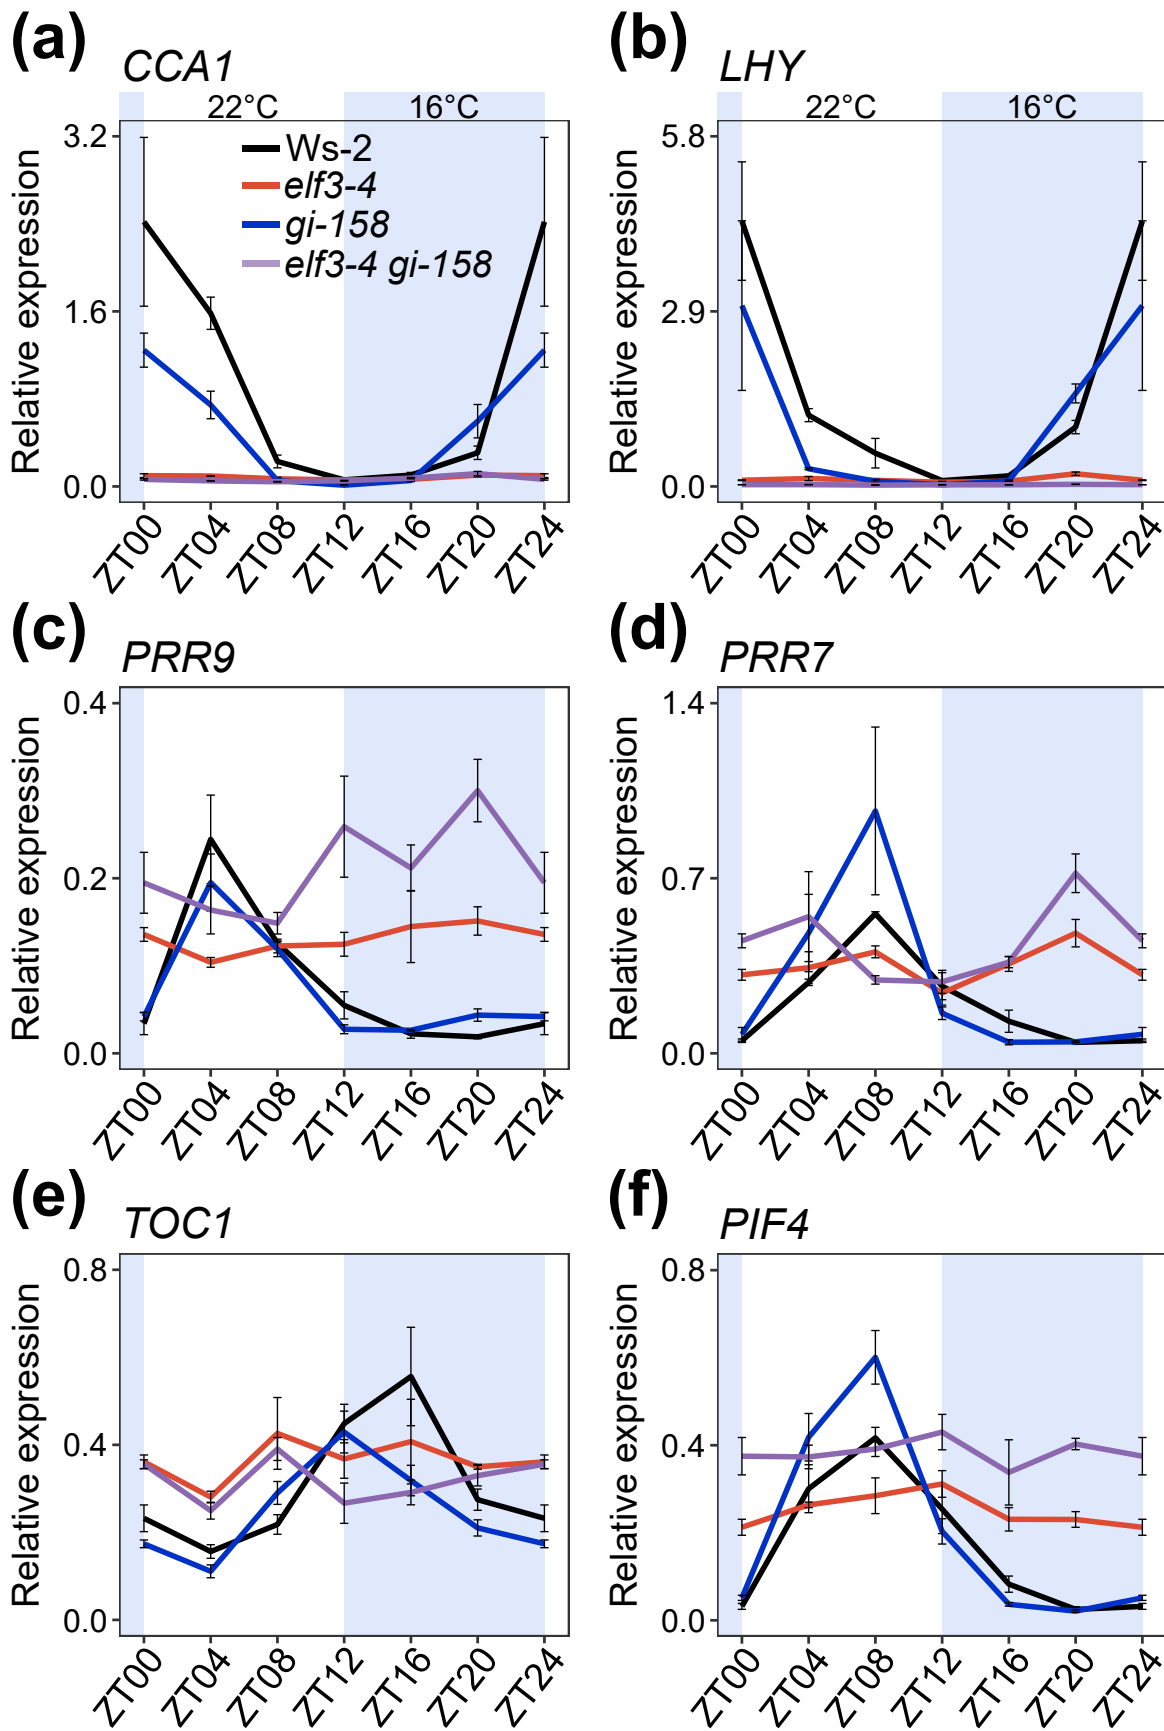

# Fig. 4

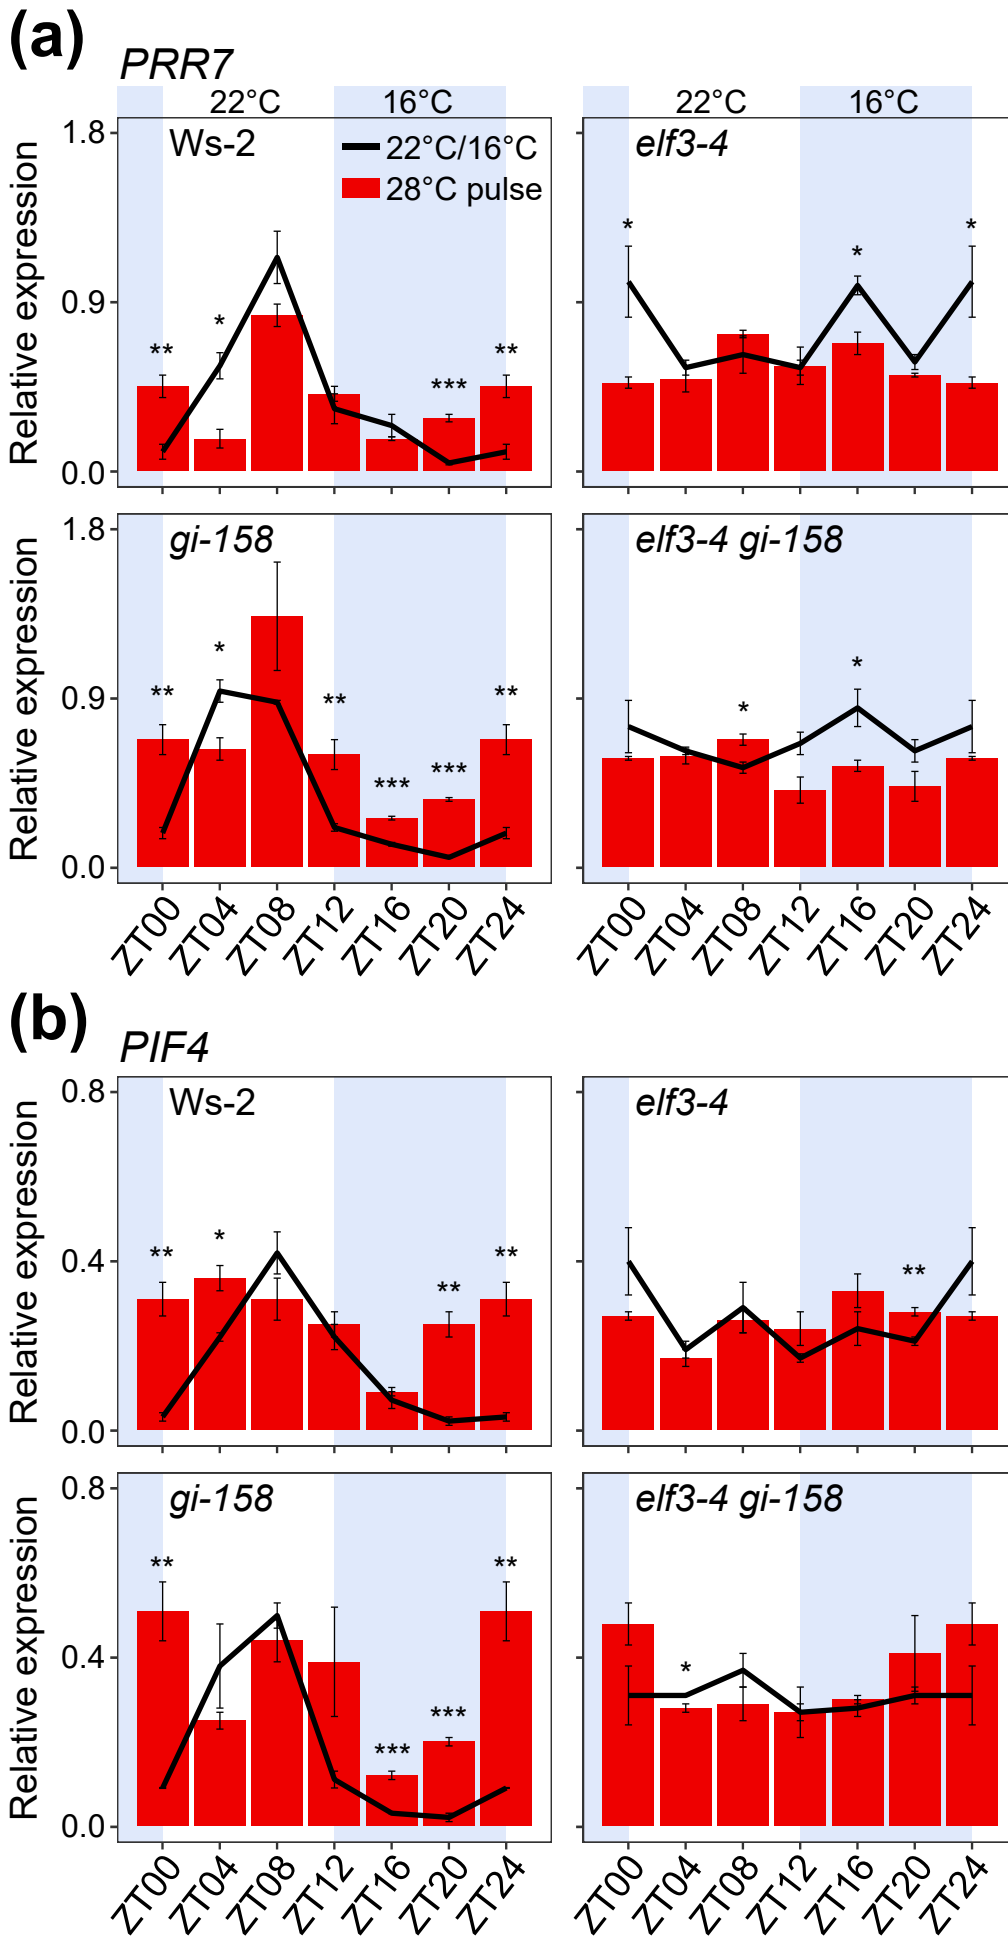

# Fig. S1

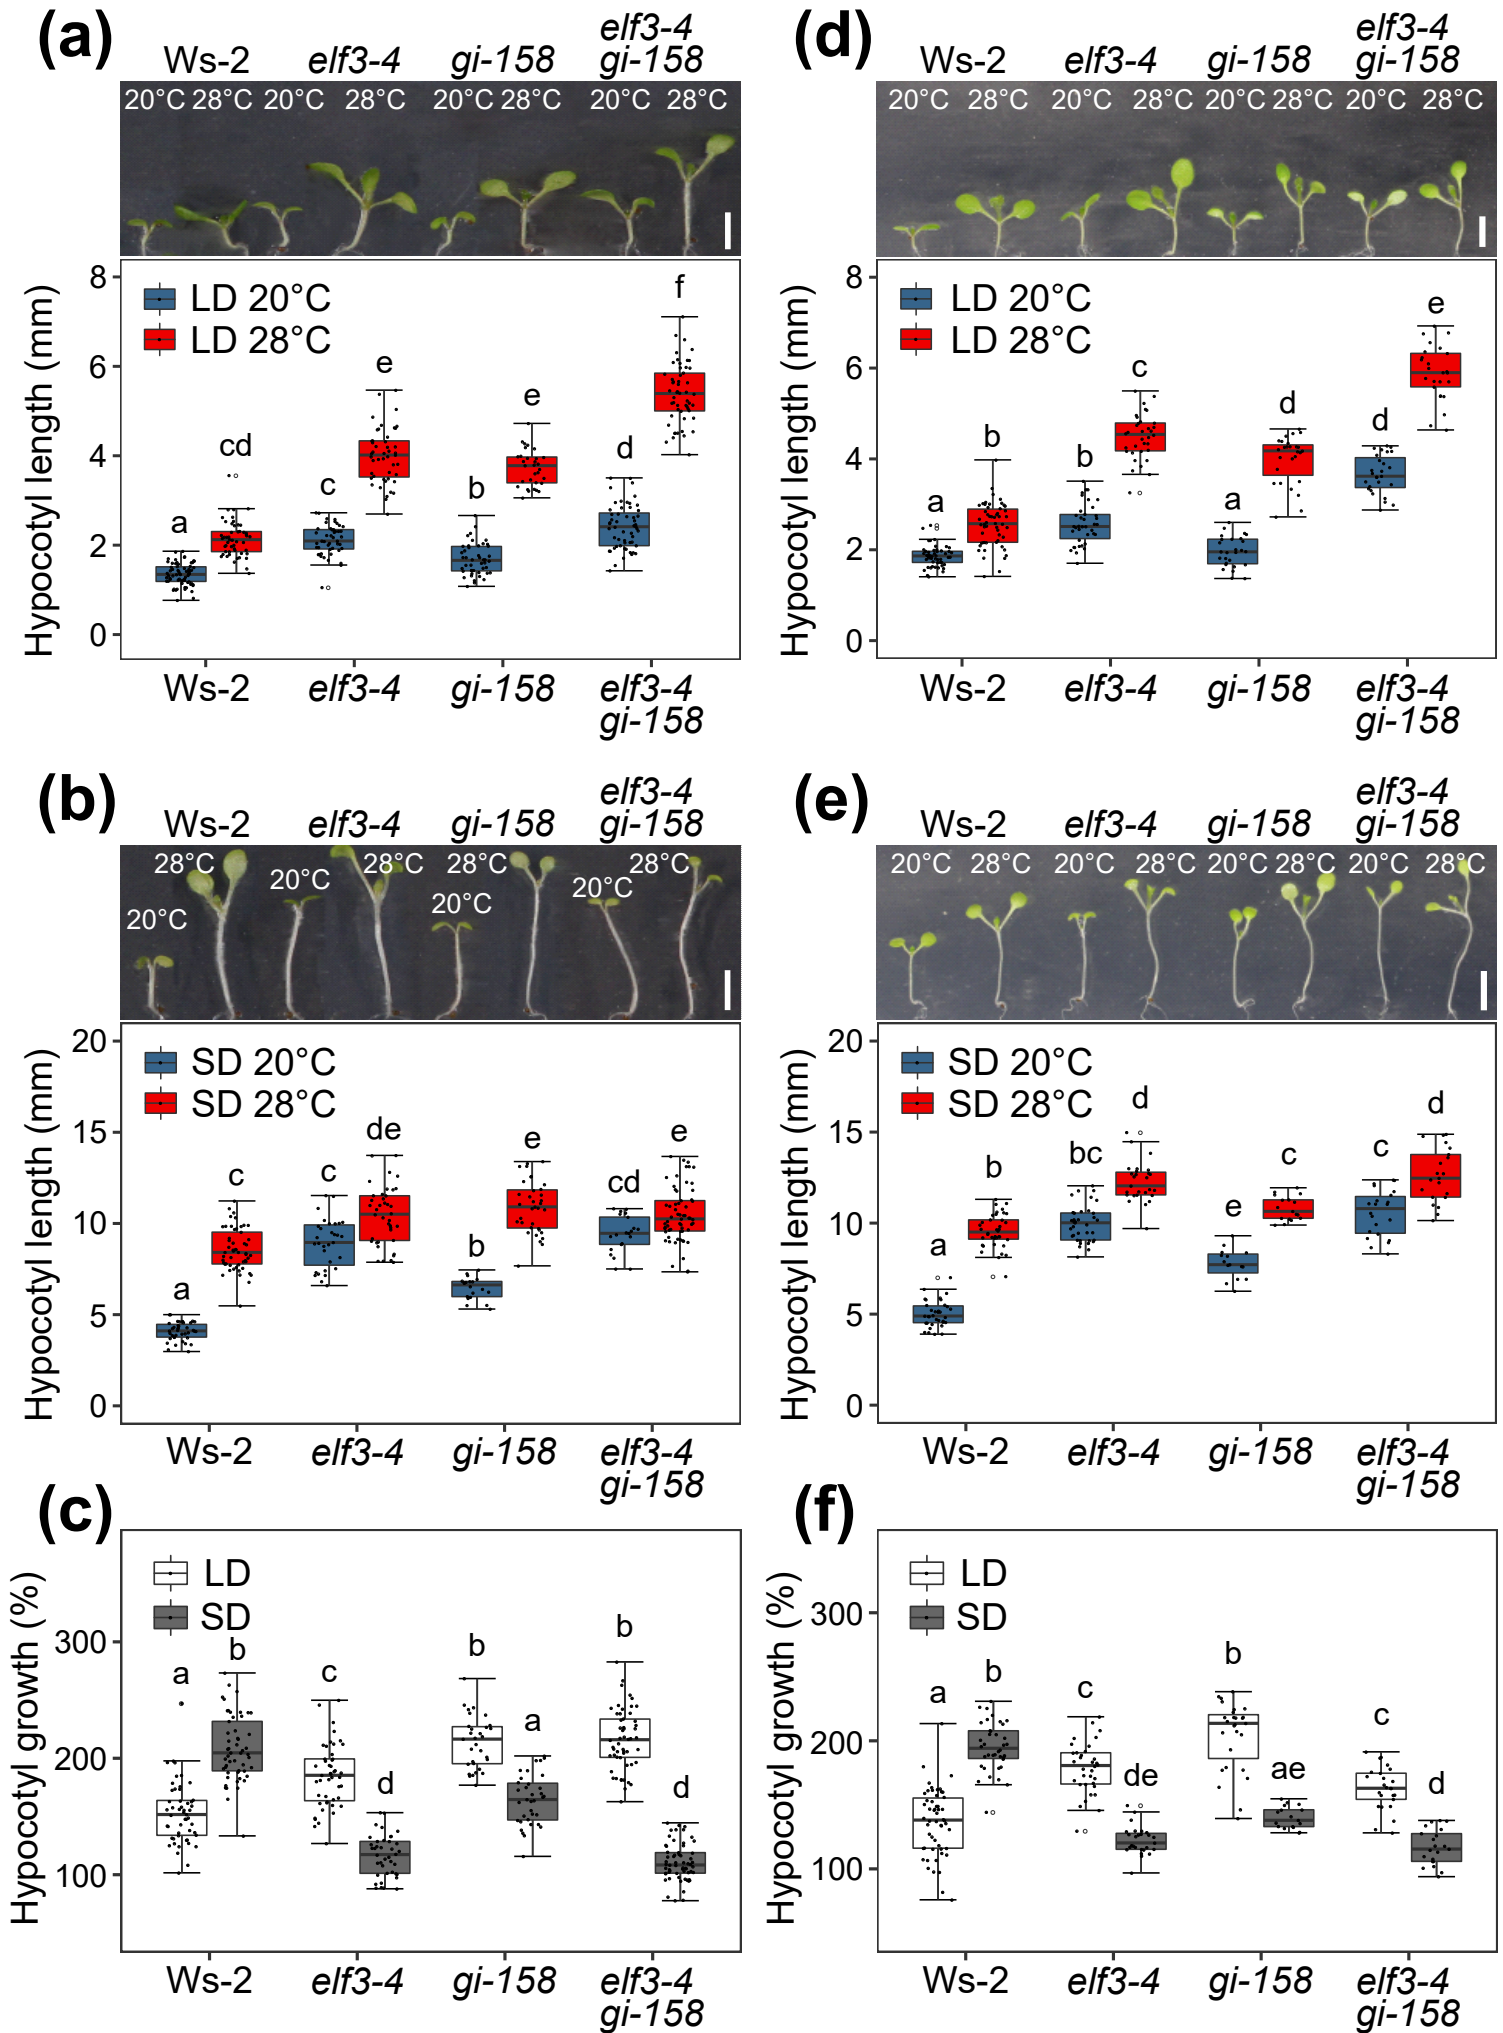

## Fig. S2

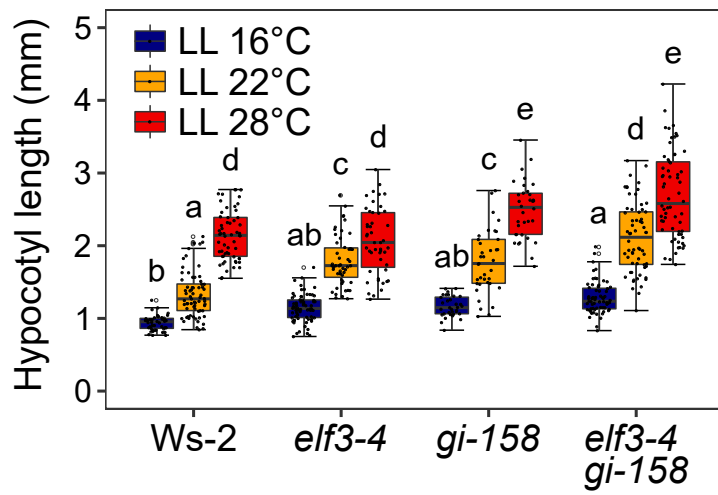

# Fig. S3

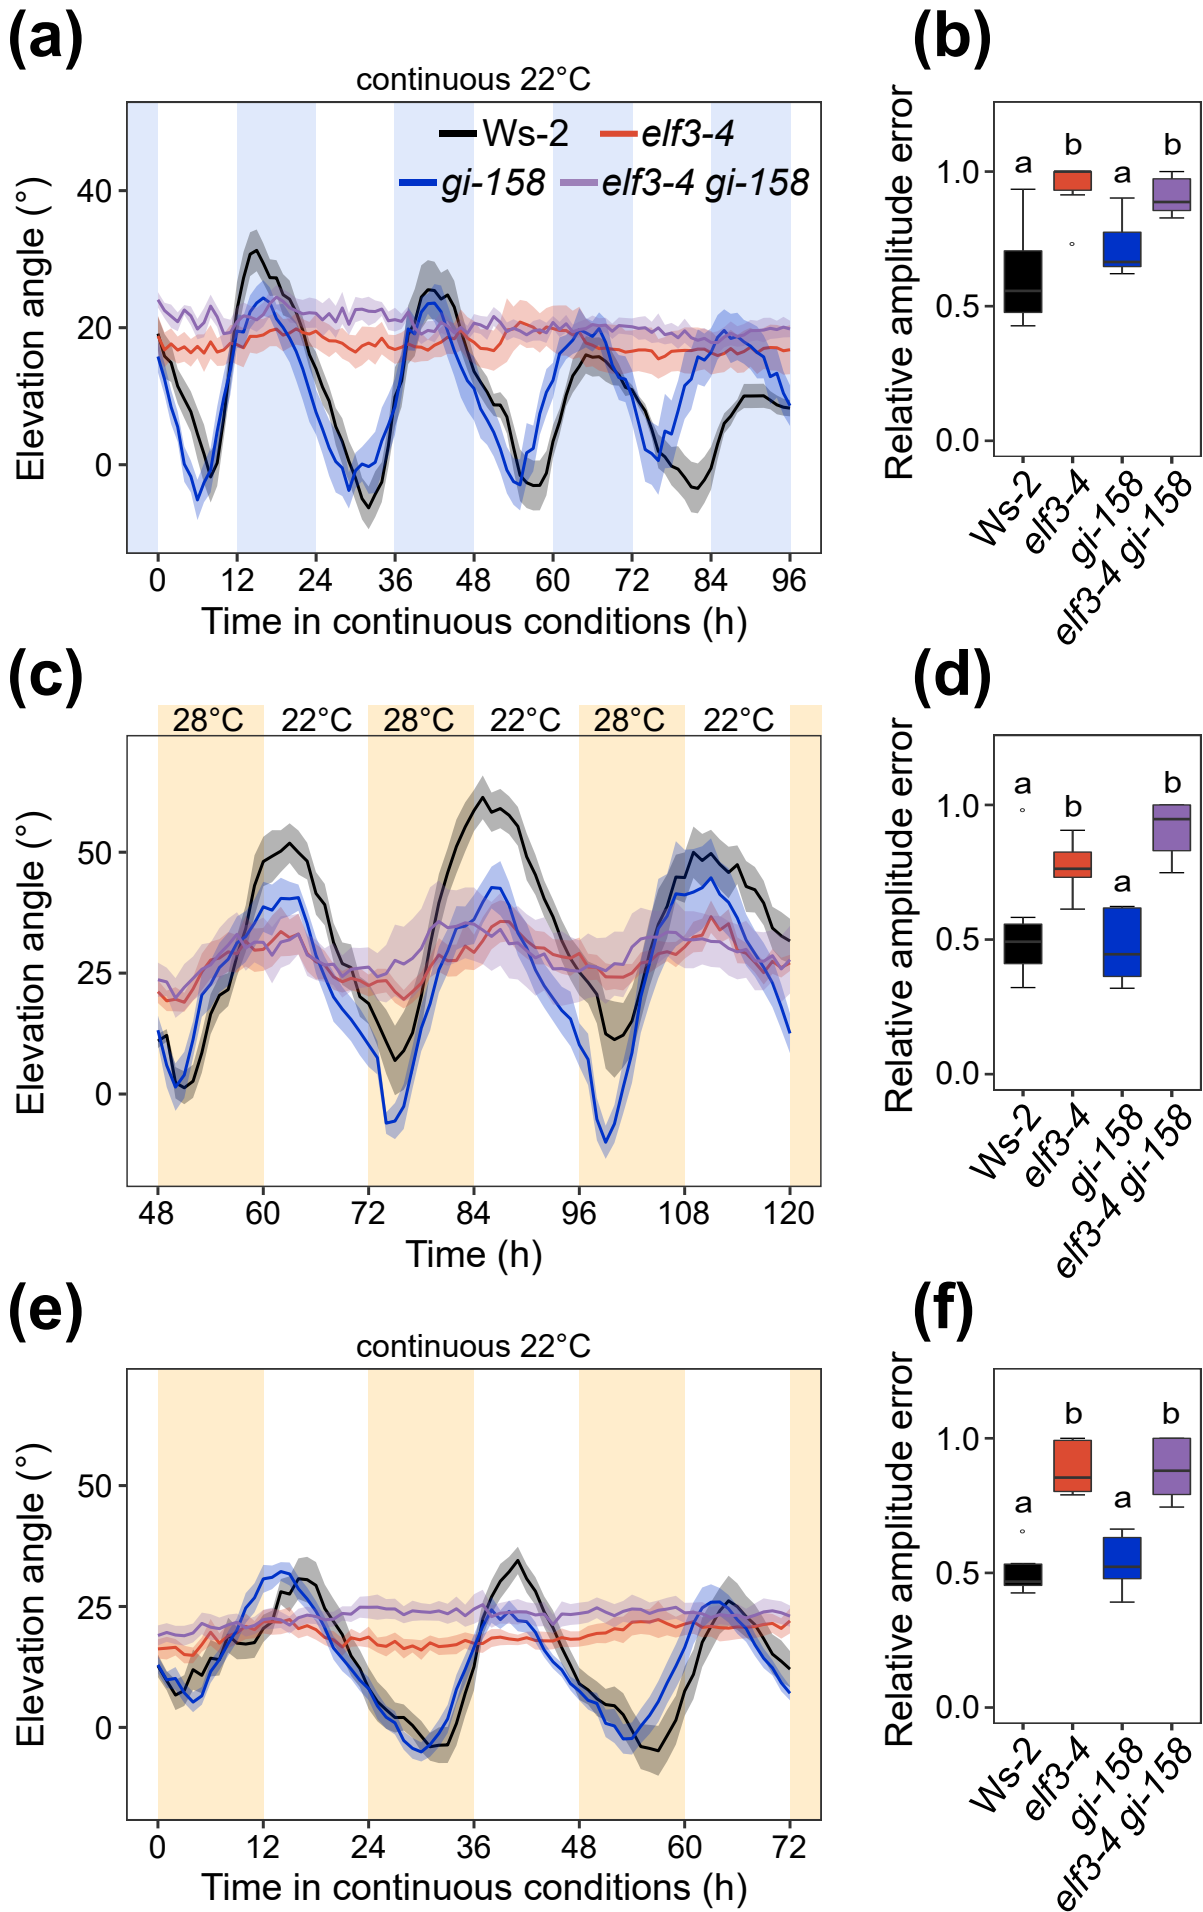

# Fig. S4

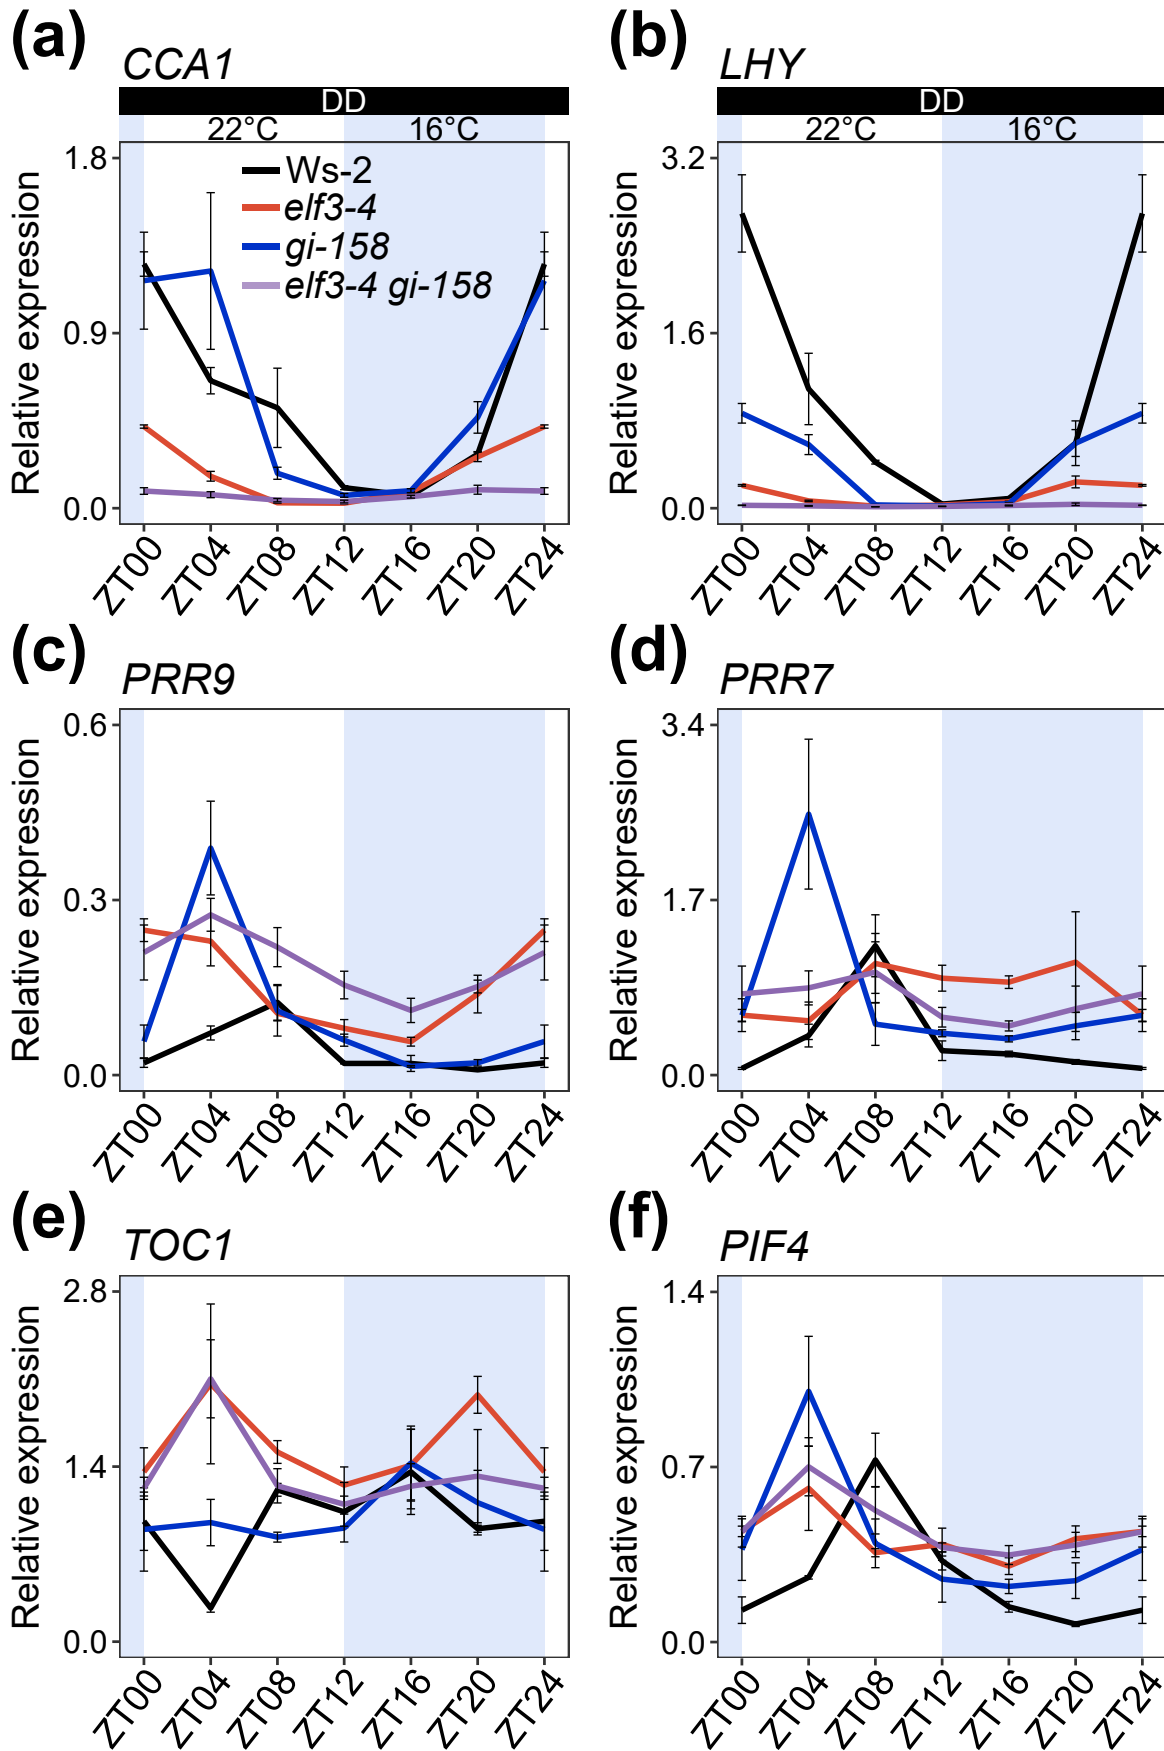



# Fig. S5

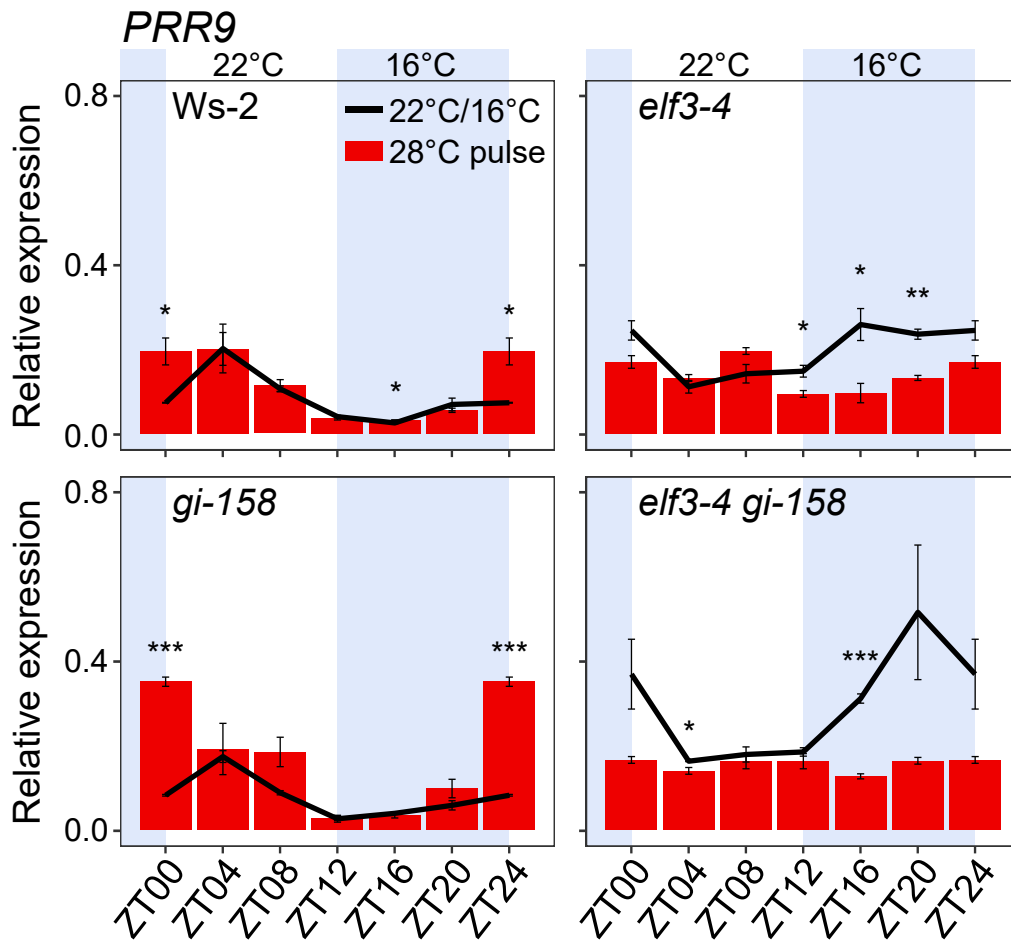

## Fig. S6

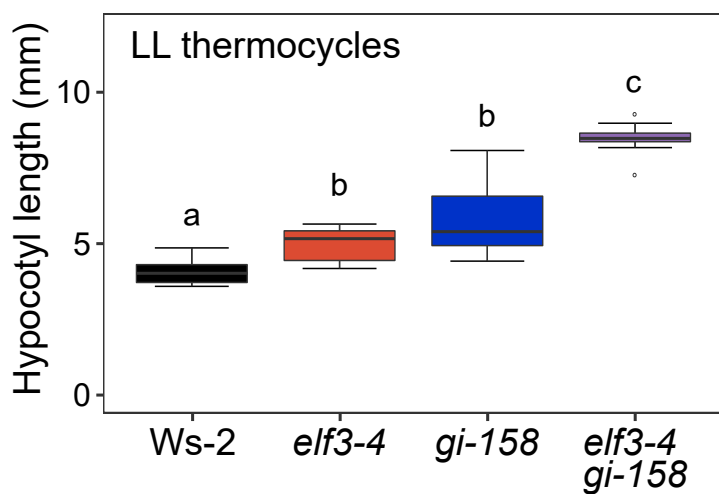

**Table S1. Rhythmic growth under thermocycles requires *ELF3*.**

| Time (h)/ZT*         | 48/ZT00                                    | 52/ZT04            | 56/ZT08                  | 60/ZT12                  | 64/ZT16             | 68/ZT20            | 72/ZT24             |          |
|----------------------|--------------------------------------------|--------------------|--------------------------|--------------------------|---------------------|--------------------|---------------------|----------|
| Genotype             | Growth (mm h <sup>-1</sup> ) ± SEM (n = 8) |                    |                          |                          |                     |                    |                     | <i>P</i> |
| <i>Ws-2</i>          | 0.0075 ± 0.0056 a†                         | 0.0533 ± 0.0250 ab | <b>0.0996 ± 0.0353</b> b | 0.0584 ± 0.0199 ab       | 0.0164 ± 0.0092 a   | 0.0100 ± 0.0071 a  | 0.0042 ± 0.0034 a   | 0.004    |
| <i>elf3-4</i>        | 0.0273 ± 0.0070                            | 0.0448 ± 0.0113    | 0.0469 ± 0.0071          | 0.0432 ± 0.0113          | 0.0258 ± 0.0058     | 0.0244 ± 0.0074    | 0.0278 ± 0.0114     | 0.299    |
| <i>gi-158</i>        | 0.0082 ± 0.0065 a                          | 0.0795 ± 0.0125 c  | 0.0746 ± 0.0192 bc       | 0.0533 ± 0.0178 abc      | 0.0318 ± 0.0078 abc | 0.0126 ± 0.0072 ab | 0.0264 ± 0.0206 abc | 0.002    |
| <i>elf3-4 gi-158</i> | 0.0788 ± 0.0202                            | 0.0858 ± 0.0148    | 0.0971 ± 0.0112          | 0.0806 ± 0.0150          | 0.0595 ± 0.0111     | 0.0476 ± 0.0144    | 0.0656 ± 0.0174     | 0.300    |
|                      | 72/ZT00                                    | 76/ZT04            | 80/ZT08                  | 84/ZT12                  | 88/ZT16             | 92/ZT20            | 96/ZT24             |          |
| <i>Ws-2</i>          | 0.0042 ± 0.0034 a                          | 0.0361 ± 0.0138 ab | <b>0.0836 ± 0.0187</b> b | 0.0410 ± 0.0208 ab       | 0.0095 ± 0.0055 a   | 0.0128 ± 0.0128 a  | 0.0019 ± 0.0011 a   | 0.003    |
| <i>elf3-4</i>        | 0.0278 ± 0.0114                            | 0.0239 ± 0.0086    | 0.0258 ± 0.0081          | 0.0150 ± 0.0064          | 0.0364 ± 0.0144     | 0.0382 ± 0.0108    | 0.0205 ± 0.0073     | 0.649    |
| <i>gi-158</i>        | 0.0264 ± 0.0206 a                          | 0.0589 ± 0.0199 ab | <b>0.0941 ± 0.0100</b> b | 0.0540 ± 0.0162 ab       | 0.0309 ± 0.0123 a   | 0.0196 ± 0.0098 a  | 0.0062 ± 0.047 a    | 0.002    |
| <i>elf3-4 gi-158</i> | 0.0656 ± 0.0174                            | 0.0641 ± 0.0115    | 0.0756 ± 0.0145          | 0.0725 ± 0.0183          | 0.0529 ± 0.0163     | 0.0575 ± 0.0129    | 0.0296 ± 0.0127     | 0.399    |
|                      | 96/ZT00                                    | 100/ZT04           | 104/ZT08                 | 108/ZT12                 | 112/ZT16            | 116/ZT20           | 120/ZT24            |          |
| <i>Ws-2</i>          | 0.0019 ± 0.0011 a                          | 0.0408 ± 0.0121 ab | 0.0405 ± 0.0120 ab       | <b>0.0711 ± 0.0231</b> b | 0.0049 ± 0.0043 a   | 0.0058 ± 0.0056 a  | 0.0239 ± 0.0131 ab  | 0.001    |
| <i>elf3-4</i>        | 0.0205 ± 0.0073                            | 0.0314 ± 0.0119    | 0.0276 ± 0.0070          | 0.0255 ± 0.0064          | 0.0425 ± 0.0125     | 0.0168 ± 0.0064    | 0.0108 ± 0.0035     | 0.193    |
| <i>gi-158</i>        | 0.0062 ± 0.0047                            | 0.0461 ± 0.0117    | 0.0535 ± 0.0190          | 0.0530 ± 0.0149          | 0.0155 ± 0.0073     | 0.0223 ± 0.0098    | 0.0164 ± 0.0113     | 0.024    |
| <i>elf3-4 gi-158</i> | 0.0296 ± 0.0127 ab                         | 0.0804 ± 0.0102 b  | 0.0776 ± 0.0216 ab       | 0.0401 ± 0.0079          | 0.0530 ± 0.0147 ab  | 0.0356 ± 0.0129 ab | 0.0211 ± 0.0107 a   | 0.017    |
|                      | 120/ZT00                                   | 124/ZT04           | 128/ZT08                 | 132/ZT12                 | 136/ZT16            | 140/ZT20           | 144/ZT24            |          |
| <i>Ws-2</i>          | 0.0239 ± 0.0131 a                          | 0.0296 ± 0.0154 ab | <b>0.0668 ± 0.0116</b> b | 0.0366 ± 0.0078 ab       | 0.0019 ± 0.0013 a   | 0.0064 ± 0.0039 a  | 0.0009 ± 0.0005 a   | 0.000    |
| <i>elf3-4</i>        | 0.0108 ± 0.0035                            | 0.0295 ± 0.0120    | 0.0334 ± 0.0105          | 0.0172 ± 0.0059          | 0.0162 ± 0.0056     | 0.0204 ± 0.0090    | 0.0142 ± 0.0090     | 0.458    |
| <i>gi-158</i>        | 0.0164 ± 0.0113 ab                         | 0.0534 ± 0.0124 bc | <b>0.0861 ± 0.0219</b> c | 0.0335 ± 0.0119 ab       | 0.0076 ± 0.0050 ab  | 0.0000 ± 0.0000 a  | 0.0000 ± 0.0000 a   | 0.000    |
| <i>elf3-4 gi-158</i> | 0.0211 ± 0.0107                            | 0.0394 ± 0.0109    | 0.0428 ± 0.0125          | 0.0193 ± 0.0070          | 0.0268 ± 0.0088     | 0.0257 ± 0.0112    | 0.0032 ± 0.0032     | 0.104    |

\*Seedlings were grown under 12 h 22°C: 12 h 16°C thermocycles in constant light. Indicated time points (every 4 h) were selected for statistics.

†Different letters indicate significant differences in growth rate within indicated time points per genotype per day (one-way ANOVA with Tukey's HSD test).

The value with the highest mean, significantly higher than the values of more than three other time points, is considered as a peak (shown in bold).

**Table S2. *ELF3* is required for oscillator's responsiveness to temperature change in constant light.**

| ZT*                  | ZT00/24                                | ZT04                     | ZT08                     | ZT12               | ZT16               | ZT20                     |  | <i>P</i> |
|----------------------|----------------------------------------|--------------------------|--------------------------|--------------------|--------------------|--------------------------|--|----------|
| Genotype             | CCA1 relative expression ± SEM (n = 3) |                          |                          |                    |                    |                          |  |          |
| Ws-2                 | <b>2.2428 ± 0.7727</b> a <sup>†</sup>  | 1.5875 ± 0.1476 ab       | 0.2306 ± 0.0583 b        | 0.0621 ± 0.0174 b  | 0.1062 ± 0.0244 b  | 0.3102 ± 0.0613 b        |  | 0.001    |
| <i>elf3-4</i>        | 0.1007 ± 0.0175                        | 0.0976 ± 0.0016          | 0.0719 ± 0.0139          | 0.0610 ± 0.0051    | 0.0677 ± 0.0063    | 0.1059 ± 0.0165          |  | 0.064    |
| <i>gi-158</i>        | <b>1.2499 ± 0.1559</b> a               | 0.7480 ± 0.1260 b        | 0.0544 ± 0.0090 c        | 0.0133 ± 0.0013 c  | 0.0565 ± 0.0098 c  | 0.5993 ± 0.1529 b        |  | 0.000    |
| <i>elf3-4 gi-158</i> | 0.0667 ± 0.0070 a                      | 0.0528 ± 0.0008 a        | 0.0449 ± 0.0023 a        | 0.0542 ± 0.0034 a  | 0.0780 ± 0.0062 ab | <b>0.1194 ± 0.0202</b> b |  | 0.001    |
|                      | LHY relative expression ± SEM (n = 3)  |                          |                          |                    |                    |                          |  |          |
| Ws-2                 | <b>4.4052 ± 0.9873</b> a               | 1.1700 ± 0.1084 b        | 0.5359 ± 0.2465 b        | 0.0787 ± 0.0286 b  | 0.1578 ± 0.0230 b  | 0.9713 ± 0.1112 b        |  | 0.000    |
| <i>elf3-4</i>        | 0.0854 ± 0.0059 a                      | 0.1132 ± 0.0343 ab       | 0.0840 ± 0.0175 a        | 0.0521 ± 0.0139 a  | 0.0700 ± 0.0029 a  | <b>0.1930 ± 0.0287</b> b |  | 0.003    |
| <i>gi-158</i>        | <b>2.9962 ± 1.4138</b> a               | 0.2764 ± 0.0165 ab       | 0.0689 ± 0.0215 b        | 0.0083 ± 0.0000 b  | 0.0746 ± 0.0132 b  | 1.5321 ± 0.1575 ab       |  | 0.017    |
| <i>elf3-4 gi-158</i> | 0.0110 ± 0.0004 ab                     | 0.0116 ± 0.0017 ab       | 0.0040 ± 0.0004 b        | 0.0088 ± 0.0040 ab | 0.0090 ± 0.0004 ab | 0.0169 ± 0.0012 a        |  | 0.002    |
|                      | PRR9 relative expression ± SEM (n = 3) |                          |                          |                    |                    |                          |  |          |
| Ws-2                 | 0.0328 ± 0.0126 ab                     | <b>0.2447 ± 0.0509</b> c | 0.1253 ± 0.0025 b        | 0.0539 ± 0.0156 ab | 0.0212 ± 0.0051 ab | 0.0177 ± 0.0022 a        |  | 0.000    |
| <i>elf3-4</i>        | 0.1354 ± 0.0079                        | 0.1033 ± 0.0056          | 0.1221 ± 0.0079          | 0.1241 ± 0.0137    | 0.1445 ± 0.0414    | 0.1509 ± 0.0163          |  | 0.665    |
| <i>gi-158</i>        | 0.0410 ± 0.0049 a                      | <b>0.1950 ± 0.0329</b> c | 0.1186 ± 0.0087 b        | 0.0264 ± 0.0051 a  | 0.0253 ± 0.0008 a  | 0.0427 ± 0.0071 a        |  | 0.000    |
| <i>elf3-4 gi-158</i> | 0.1948 ± 0.0350                        | 0.1635 ± 0.0275          | 0.1483 ± 0.0124          | 0.2593 ± 0.0581    | 0.2118 ± 0.0265    | 0.3008 ± 0.0359          |  | 0.066    |
|                      | PRR7 relative expression ± SEM (n = 3) |                          |                          |                    |                    |                          |  |          |
| Ws-2                 | 0.0463 ± 0.0070 ab                     | 0.2812 ± 0.0129 c        | <b>0.5575 ± 0.0078</b> d | 0.2657 ± 0.0544 c  | 0.1247 ± 0.0446 b  | 0.0398 ± 0.0060 a        |  | 0.000    |
| <i>elf3-4</i>        | 0.3115 ± 0.0218 ab                     | 0.3402 ± 0.0641 ab       | 0.4039 ± 0.0239 ab       | 0.2385 ± 0.0488 a  | 0.3555 ± 0.0302 ab | 0.4791 ± 0.0552 b        |  | 0.034    |
| <i>gi-158</i>        | 0.0721 ± 0.0275 a                      | 0.4797 ± 0.1555 ab       | <b>0.9709 ± 0.3374</b> b | 0.1570 ± 0.0254 a  | 0.0402 ± 0.0104 a  | 0.0418 ± 0.0038 a        |  | 0.001    |
| <i>elf3-4 gi-158</i> | 0.4483 ± 0.0280 ab                     | 0.5457 ± 0.1809 ab       | 0.2909 ± 0.0169 a        | 0.2832 ± 0.0463 a  | 0.3623 ± 0.0222 ab | 0.7201 ± 0.0777 b        |  | 0.023    |

Continued on the next page

**Table S2. (continued)**

| ZT                   | ZT00/24                                           | ZT04                  | ZT08                                    | ZT12                                    | ZT16                                    | ZT20                    |          |
|----------------------|---------------------------------------------------|-----------------------|-----------------------------------------|-----------------------------------------|-----------------------------------------|-------------------------|----------|
| Genotype             | <i>TOC1</i> relative expression $\pm$ SEM (n = 3) |                       |                                         |                                         |                                         |                         | <i>P</i> |
| Ws-2                 | 0.2311 $\pm$ 0.0307 ab                            | 0.1547 $\pm$ 0.0156 a | 0.2169 $\pm$ 0.0225 ab                  | 0.4489 $\pm$ 0.0443 bc                  | <b>0.5571 <math>\pm</math> 0.1131</b> c | 0.2739 $\pm$ 0.0244 ab  | 0.001    |
| <i>elf3-4</i>        | 0.3609 $\pm$ 0.0158                               | 0.2800 $\pm$ 0.0134   | 0.4263 $\pm$ 0.0825                     | 0.3676 $\pm$ 0.0445                     | 0.4075 $\pm$ 0.0973                     | 0.3496 $\pm$ 0.0056     | 0.675    |
| <i>gi-158</i>        | 0.1724 $\pm$ 0.0089 ab                            | 0.1092 $\pm$ 0.0148 a | 0.2894 $\pm$ 0.0263 bc                  | <b>0.4294 <math>\pm</math> 0.0481</b> d | 0.3179 $\pm$ 0.0350 cd                  | 0.2090 $\pm$ 0.0186 abc | 0.000    |
| <i>elf3-4 gi-158</i> | 0.3555 $\pm$ 0.0100 ab                            | 0.2486 $\pm$ 0.0194 a | 0.3904 $\pm$ 0.0263 b                   | 0.2658 $\pm$ 0.0463 ab                  | 0.2906 $\pm$ 0.0285 ab                  | 0.3292 $\pm$ 0.0236 ab  | 0.027    |
|                      | <i>PIF4</i> relative expression $\pm$ SEM (n = 3) |                       |                                         |                                         |                                         |                         |          |
| Ws-2                 | 0.0286 $\pm$ 0.0068 a                             | 0.2991 $\pm$ 0.0551 b | <b>0.4161 <math>\pm</math> 0.0241</b> b | 0.2523 $\pm$ 0.0563 b                   | 0.0797 $\pm$ 0.0186 a                   | 0.0217 $\pm$ 0.0062 a   | 0.000    |
| <i>elf3-4</i>        | 0.2105 $\pm$ 0.0184                               | 0.2620 $\pm$ 0.0064   | 0.2830 $\pm$ 0.0411                     | 0.3101 $\pm$ 0.0306                     | 0.2288 $\pm$ 0.0269                     | 0.2284 $\pm$ 0.0180     | 0.129    |
| <i>gi-158</i>        | 0.0482 $\pm$ 0.0059 ab                            | 0.4175 $\pm$ 0.0546 c | <b>0.6012 <math>\pm</math> 0.0616</b> d | 0.2010 $\pm$ 0.0291 b                   | 0.0333 $\pm$ 0.0041 ab                  | 0.0177 $\pm$ 0.0028 a   | 0.000    |
| <i>elf3-4 gi-158</i> | 0.3739 $\pm$ 0.0430                               | 0.3722 $\pm$ 0.0271   | 0.3904 $\pm$ 0.0172                     | 0.4293 $\pm$ 0.0407                     | 0.3366 $\pm$ 0.0750                     | 0.4019 $\pm$ 0.0131     | 0.734    |

\*Seedlings were grown under 12 h 22°C: 12 h 16°C thermocycles in constant light for 8 d. On day 9, starting from ZT00, samples were harvested every 4 h. Expression levels were normalized to *PP2A*.

†Different letters indicate significant differences in expression level within indicated time points per genotype (one-way ANOVA with Tukey's HSD test). The value with the highest mean, significantly higher than the values of more than three other time points, is considered as a peak (shown in bold).

**Table S3. *ELF3* is required for oscillator's responsiveness to temperature change in darkness.**

| ZT*                  | ZT00/24                                              | ZT04                                    | ZT08                                    | ZT12                   | ZT16                  | ZT20                    | <i>P</i> |
|----------------------|------------------------------------------------------|-----------------------------------------|-----------------------------------------|------------------------|-----------------------|-------------------------|----------|
| Genotype             | <i>CCA1</i> relative expression $\pm$ SEM (n = 3)    |                                         |                                         |                        |                       |                         |          |
| Ws-2                 | <b>1.2574 <math>\pm</math> 0.0631</b> a <sup>†</sup> | 0.6539 $\pm$ 0.0682 b                   | 0.5135 $\pm$ 0.2051 bc                  | 0.1004 $\pm$ 0.0104 cd | 0.0592 $\pm$ 0.0026 d | 0.2736 $\pm$ 0.0133 bcd | 0.000    |
| <i>elf3-4</i>        | <b>0.4167 <math>\pm</math> 0.0084</b> a              | 0.1595 $\pm$ 0.0253 c                   | 0.0223 $\pm$ 0.0011 d                   | 0.0200 $\pm$ 0.0037 d  | 0.0786 $\pm$ 0.0040 d | 0.2598 $\pm$ 0.0245 b   | 0.000    |
| <i>gi-158</i>        | 1.1713 $\pm$ 0.2508 a                                | <b>1.2214 <math>\pm</math> 0.4053</b> a | 0.1751 $\pm$ 0.0312 b                   | 0.0608 $\pm$ 0.0099 b  | 0.0850 $\pm$ 0.0102 b | 0.4639 $\pm$ 0.0815 ab  | 0.002    |
| <i>elf3-4 gi-158</i> | 0.0832 $\pm$ 0.0171                                  | 0.0643 $\pm$ 0.0156                     | 0.0359 $\pm$ 0.0088                     | 0.0287 $\pm$ 0.0071    | 0.0538 $\pm$ 0.0073   | 0.0899 $\pm$ 0.0232     | 0.064    |
|                      | <i>LHY</i> relative expression $\pm$ SEM (n = 3)     |                                         |                                         |                        |                       |                         |          |
| Ws-2                 | <b>2.7008 <math>\pm</math> 0.3554</b> a              | 1.0864 $\pm$ 0.3283 b                   | 0.4135 $\pm$ 0.0173 bc                  | 0.0277 $\pm$ 0.0092 c  | 0.0789 $\pm$ 0.0117 c | 0.5893 $\pm$ 0.1235 bc  | 0.000    |
| <i>elf3-4</i>        | <b>0.2001 <math>\pm</math> 0.0077</b> a              | 0.0569 $\pm$ 0.0066 b                   | 0.0086 $\pm$ 0.0017 b                   | 0.0189 $\pm$ 0.0126 b  | 0.0489 $\pm$ 0.0054 b | 0.2315 $\pm$ 0.0544 a   | 0.000    |
| <i>gi-158</i>        | <b>0.8628 <math>\pm</math> 0.0902</b> a              | 0.5746 $\pm$ 0.0916 a                   | 0.0203 $\pm$ 0.0038 b                   | 0.0104 $\pm$ 0.0003 b  | 0.0309 $\pm$ 0.0103 b | 0.5875 $\pm$ 0.2054 a   | 0.000    |
| <i>elf3-4 gi-158</i> | 0.0165 $\pm$ 0.0021                                  | 0.0112 $\pm$ 0.0029                     | 0.0032 $\pm$ 0.0004                     | 0.0067 $\pm$ 0.0019    | 0.0145 $\pm$ 0.0038   | 0.0259 $\pm$ 0.0118     | 0.076    |
|                      | <i>PRR9</i> relative expression $\pm$ SEM (n = 3)    |                                         |                                         |                        |                       |                         |          |
| Ws-2                 | 0.0191 $\pm$ 0.0077 a                                | 0.0707 $\pm$ 0.0121 ab                  | <b>0.1235 <math>\pm</math> 0.0307</b> b | 0.0182 $\pm$ 0.0008 a  | 0.0182 $\pm$ 0.0138 a | 0.0071 $\pm$ 0.0010 a   | 0.000    |
| <i>elf3-4</i>        | <b>0.2480 <math>\pm</math> 0.0196</b> a              | 0.2290 $\pm$ 0.0426 a                   | 0.1046 $\pm$ 0.0130 b                   | 0.0788 $\pm$ 0.0150 b  | 0.0557 $\pm$ 0.0076 b | 0.1378 $\pm$ 0.0325 a   | 0.000    |
| <i>gi-158</i>        | 0.0561 $\pm$ 0.0283 a                                | <b>0.3896 <math>\pm</math> 0.0808</b> b | 0.1089 $\pm$ 0.0435 a                   | 0.0583 $\pm$ 0.0104 a  | 0.0131 $\pm$ 0.0014 a | 0.0192 $\pm$ 0.0056 a   | 0.000    |
| <i>elf3-4 gi-158</i> | 0.2095 $\pm$ 0.0474 ab                               | 0.2745 $\pm$ 0.0283 a                   | 0.2187 $\pm$ 0.0337 ab                  | 0.1534 $\pm$ 0.0238 ab | 0.1096 $\pm$ 0.0209 b | 0.1508 $\pm$ 0.0110 ab  | 0.018    |
|                      | <i>PRR7</i> relative expression $\pm$ SEM (n = 3)    |                                         |                                         |                        |                       |                         |          |
| Ws-2                 | 0.0544 $\pm$ 0.0095 a                                | 0.3754 $\pm$ 0.1112 a                   | <b>1.2529 <math>\pm</math> 0.3027</b> b | 0.2273 $\pm$ 0.0957 a  | 0.1954 $\pm$ 0.0275 a | 0.1178 $\pm$ 0.0230 a   | 0.000    |
| <i>elf3-4</i>        | 0.5748 $\pm$ 0.1601                                  | 0.5198 $\pm$ 0.1831                     | 1.0803 $\pm$ 0.2927                     | 0.9360 $\pm$ 0.1266    | 0.8973 $\pm$ 0.0615   | 1.0932 $\pm$ 0.4919     | 0.509    |
| <i>gi-158</i>        | 0.5732 $\pm$ 0.0575 a                                | <b>2.5391 <math>\pm</math> 0.7324</b> b | 0.4870 $\pm$ 0.2074 a                   | 0.3980 $\pm$ 0.0340 a  | 0.3433 $\pm$ 0.0298 a | 0.4701 $\pm$ 0.1349 a   | 0.002    |
| <i>elf3-4 gi-158</i> | 0.7825 $\pm$ 0.2720                                  | 0.8412 $\pm$ 0.1663                     | 0.9947 $\pm$ 0.2969                     | 0.5547 $\pm$ 0.0958    | 0.4696 $\pm$ 0.0492   | 0.6372 $\pm$ 0.2218     | 0.510    |

Continued on the next page

**Table S3. (continued)**

| ZT                   | ZT00/24                                           | ZT04                                    | ZT08                                    | ZT12                   | ZT16                   | ZT20                   |          |
|----------------------|---------------------------------------------------|-----------------------------------------|-----------------------------------------|------------------------|------------------------|------------------------|----------|
| Genotype             | <i>TOC1</i> relative expression $\pm$ SEM (n = 3) |                                         |                                         |                        |                        |                        | <i>P</i> |
| Ws-2                 | 0.9602 $\pm$ 0.2345 ab                            | 0.2613 $\pm$ 0.0329 a                   | 1.2131 $\pm$ 0.0514 b                   | 1.0353 $\pm$ 0.1270 ab | 1.3578 $\pm$ 0.3430 b  | 0.8997 $\pm$ 0.0282 ab | 0.016    |
| <i>elf3-4</i>        | 1.3573 $\pm$ 0.1940                               | 2.0654 $\pm$ 0.6431                     | 1.5174 $\pm$ 0.0916                     | 1.2508 $\pm$ 0.1465    | 1.4111 $\pm$ 0.2885    | 1.9775 $\pm$ 0.1485    | 0.369    |
| <i>gi-158</i>        | 0.8942 $\pm$ 0.3355                               | 0.9496 $\pm$ 0.1865                     | 0.8324 $\pm$ 0.0399                     | 0.9055 $\pm$ 0.1122    | 1.4289 $\pm$ 0.2970    | 1.1089 $\pm$ 0.2600    | 0.499    |
| <i>elf3-4 gi-158</i> | 1.2253 $\pm$ 0.0890                               | 2.1064 $\pm$ 0.3141                     | 1.2452 $\pm$ 0.1378                     | 1.0964 $\pm$ 0.1763    | 1.2418 $\pm$ 0.1816    | 1.3230 $\pm$ 0.3751    | 0.095    |
|                      | <i>PIF4</i> relative expression $\pm$ SEM (n = 3) |                                         |                                         |                        |                        |                        |          |
| Ws-2                 | 0.1223 $\pm$ 0.0534 ab                            | 0.2543 $\pm$ 0.0069 ab                  | <b>0.7268 <math>\pm</math> 0.1074</b> c | 0.3206 $\pm$ 0.0366 b  | 0.1358 $\pm$ 0.0214 ab | 0.0663 $\pm$ 0.0098 a  | 0.000    |
| <i>elf3-4</i>        | 0.4393 $\pm$ 0.0211                               | 0.6128 $\pm$ 0.1697                     | 0.3535 $\pm$ 0.0163                     | 0.3875 $\pm$ 0.0648    | 0.2996 $\pm$ 0.0338    | 0.4095 $\pm$ 0.0518    | 0.180    |
| <i>gi-158</i>        | 0.3660 $\pm$ 0.1239 a                             | <b>1.0029 <math>\pm</math> 0.2212</b> b | 0.3912 $\pm$ 0.0980 a                   | 0.2473 $\pm$ 0.0929 a  | 0.2179 $\pm$ 0.0288 a  | 0.2410 $\pm$ 0.0717 a  | 0.005    |
| <i>elf3-4 gi-158</i> | 0.4381 $\pm$ 0.0620 ab                            | 0.6993 $\pm$ 0.1169 b                   | 0.5234 $\pm$ 0.0944 ab                  | 0.3746 $\pm$ 0.0183 ab | 0.3442 $\pm$ 0.0380 a  | 0.3846 $\pm$ 0.0509 ab | 0.036    |

\*Seedlings were grown under 12 h 22°C: 12 h 16°C thermocycles in darkness for 8 d. On day 9, starting from ZT00, samples were harvested every 4 h. Expression levels were normalized to *PP2A*.

†Different letters indicate significant differences in expression level within indicated time points per genotype (one-way ANOVA with Tukey's HSD test). The value with the highest mean, significantly higher than the values of more than three other time points, is considered as a peak (shown in bold).
